1 Feasibility and safety of a telemetric pulmonary artery pressure monitoring system in acute and  
2 chronic porcine models of pulmonary hypertension.

3

4 Alexander M. K. Rothman<sup>1,2,3</sup>, Nadine D. Arnold<sup>2</sup>, Jacob Abou-Hanna<sup>4</sup>, Omid Forouzan<sup>4</sup>,  
5 Andrew J. Swift<sup>1,2,3</sup>, Payman Dahaghin<sup>2</sup>, Shiran Konganige<sup>2</sup>, Jennifer T. Middleton<sup>2</sup>, Hamza  
6 Zafar<sup>2</sup>, S. Kim Suvarna<sup>1,2</sup>, David G Kiely<sup>1,2,3</sup>, Julian Gunn<sup>1,2,3</sup>

7

8 1 - Sheffield Teaching Hospitals NHS Trust, Sheffield, UK

9 2 - Infection, Immunity and Cardiovascular Disease, University of Sheffield, UK

10 3 - Institute for Insilico Medicine, University of Sheffield, UK

11 4 - Endotronix Inc., Chicago, USA

12

13 Running Title: Endotronix pulmonary artery pressure monitor

14

15 Correspondence: Dr A Rothman, Department of Infection, Immunity and Cardiovascular  
16 Science, University of Sheffield, The Medical School, Beech Hill Road, Sheffield, S10 2RX,  
17 United Kingdom. Tel: +44 114 226 1432 Fax: +44 114 271 1863.

18 Email: [a.rothman@sheffield.ac.uk](mailto:a.rothman@sheffield.ac.uk)

19

20 Conflict of interest statement: AR has consulted for Endotronix; JAH, OF, are employed by  
21 Endotronix.

22

23 **Abstract:**

24 Aims: Pulmonary hypertension (PH) is associated with significant morbidity and mortality and  
25 leads to progressive right heart failure. In patients with PAH, haemodynamic parameters  
26 measured at catheterisation relate to clinical worsening events, in patients with heart failure  
27 proactive pulmonary artery pressure based therapeutic intervention reduces hospitalisation.  
28 We therefore investigated use of a novel implanted pulmonary artery (PA) pressure monitor to  
29 detect clinically relevant changes in pressure in large animal models of pulmonary hypertension  
30 (PH).

31  
32 Methods and Results: Prototype pulmonary artery pressure sensors (Endotronic) were  
33 implanted using standard interventional techniques. Acute PH was induced by infusion of  
34 thromboxane A2 in domestic swine. Over a physiological range pressure monitors remained  
35 concordant to reference catheter (bias -0.43, 95%CI-5.3-4.4). Chronic PH was induced by i.p.  
36 injection of monocrotaline. Implanted pressure sensors demonstrated a gradual rise in PA  
37 pressure over 30 days (baseline: 20.7+/-0.4 vrs day-30: 31.74+/-1.4, p<0.01). Pressure sensor  
38 derived readings matched reference catheter at baseline and day-30. Pressure sensors  
39 remained stable and no adverse events were identified by clinical and histological examination.

40  
41 Conclusions: The development of PA pressure monitors provide long-term haemodynamic data  
42 that identified clinically meaningful changes in pulmonary artery pressure. In addition to  
43 proactive heart failure management, such devices may be used to optimise or personalize  
44 patient therapy, investigate aspects of physiology and pathology essential to the understanding  
45 of disease and provide the opportunity to assess therapeutic interventions in clinical studies.

46

47

48 **Introduction:**

49

50 Pulmonary hypertension (PH) comprises a range of diseases defined by a resting mean  
51 pulmonary artery pressure (PAP) of  $\geq 25$  mmHg.<sup>1-3</sup> Approved therapies are licensed only for  
52 patients with pulmonary arterial hypertension (PAH) and chronic thromboembolic pulmonary  
53 hypertension (CTEPH) acting through pharmacological modulation of the prostacyclin,  
54 endothelin or nitric oxide pathways.<sup>1-3</sup> Excepting patients with a vasodilator response, drug  
55 choice is empirical and clinical management uniform, based upon an algorithm that matches  
56 functional class to a number of vasodilator agents.<sup>2</sup> In clinical practise PAH progression is  
57 determined by assessment of symptoms, exercise capacity and measurements of right  
58 ventricular function<sup>2,4</sup>. Clinical studies of therapies for PH use a range of surrogate measures  
59 as primary endpoints including invasive measurement of pulmonary haemodynamics, 6-minute  
60 walk test, quality of life measures, non-invasive imaging and, in recent phase III studies,  
61 composite endpoints of clinical worsening.<sup>5-9</sup> In patients with PAH observational studies have  
62 identified relationships between haemodynamic parameters measured at right heart  
63 catheterisation and clinical worsening events. Pooled patient-level data from over 1100 patients  
64 enrolled into FDA drug approval studies demonstrated that active treatments alter mean right  
65 atrial pressure (RAP), mean pulmonary artery pressure (mPAP), cardiac output (CO), cardiac  
66 index (CI), pulmonary vascular resistance (PVR) and pulmonary artery compliance, and that  
67 with knowledge of treatment allocation these parameters are predictive of clinical events.<sup>10</sup>  
68 However, the invasive nature and cost of cardiac catheterisation usually limits its use to  
69 establishing diagnosis, follow-up in selected patients and the conduct of phase II studies.

70

71 The development of implantable pressure monitors permits alteration of clinical therapy based  
72 on daily pulmonary artery pressure measurements. The benefit of such hemodynamic  
73 parameter-guided therapy has been studied in patients with heart failure with both preserved  
74 and reduced ejection fraction. In these patient groups, elevation of cardiac filling pressures  
75 precedes clinical worsening events by  $\geq 1$  to 2 weeks.<sup>11,12</sup> Early, proactive pressure-guided  
76 heart failure management using implantable pulmonary artery pressure monitors has been  
77 demonstrated to reduce hospitalisation in comparison to standard care.<sup>13-15</sup> These findings

78 suggest that continuously monitored pulmonary haemodynamics may inform clinical decision  
79 making, improve clinical outcomes and reduce healthcare costs in patients with heart  
80 failure.<sup>16,17</sup> The annual per patient therapeutic cost for a patient with PAH is £20K/year rising to  
81 £100K/year for those on triple combination therapy.<sup>18</sup> However, recent phase III studies  
82 demonstrate that discontinuation of regulatory approved therapies is not uncommon (21.7-  
83 29.1%<sup>6,19</sup>). Therefore, the ability to measure pulmonary artery pressures via an implantable  
84 pressure monitor may provide a means of matching individual patients with PAH to therapies  
85 effective for their disease and track changes in pressure with time to provide early, meaningful  
86 indicators that may be used to alter drug therapy prior to clinical deterioration.<sup>20</sup> This approach  
87 may also provide an alternative means of undertaking phase II clinical studies in patients with  
88 PH.

89

90 The present study examines the safety, short and long-term accuracy of a novel pulmonary  
91 artery pressure monitor system, to detect potentially clinically relevant alterations in pulmonary  
92 artery pressures in animal models with raised pulmonary artery pressures.

93 **Methods:**

94 **Anaesthetic and vascular access**

95 All animal studies were conducted in Yorkshire white pigs (25-43 kg) in accordance with The  
96 Animals (Scientific Procedures) Act 1986 under UK Home Office Project License 40/3695 and  
97 40/3722. Under anaesthesia (intramuscular azaperone, 40 mg/mL at 6 mg/kg; intravenous  
98 propofol, 10 mg/mL at 3 mg/kg; and isoflurane, 2% to 3% in 100% O<sub>2</sub> via endotracheal tube)  
99 the right femoral vein and artery (device implantation), or internal jugular and carotid artery (re-  
100 catheterisation) were exposed using standard surgical techniques and vascular access gained  
101 via a 14F (Bard, USA) and 7F (Medtronic, UK) introducer respectively. With radiographic  
102 guidance (BV Pulsera, Philips, UK) pulmonary angiography and left and right heart  
103 catheterisation were performed using standard interventional techniques<sup>21,22</sup> Invasive pressure  
104 was measured by fluid filled and Millar catheter (Ventri-Cath 510 and Mikro-Cath, Millar, USA)  
105 with simultaneous recording of ECG and core temperature using a PowerLab 8/35 (AD  
106 Instruments). Data were displayed and analysed using LabChart Pro (AD Instruments).

107

108 **Pressure monitor implantation**

109 Prototype pulmonary artery pressure monitors and delivery systems were provided by  
110 Endotronix (Chicago, USA). The pulmonary artery pressure monitors were sanitised with 100%  
111 ethanol dip immediately prior to delivery system attachment using aseptic techniques. A 7F  
112 Swan-Ganz catheter (Edwards) was positioned in the left pulmonary artery via the right femoral  
113 vein. A 260cm 0.025' Amplatz guidewire (Cook, UK) was inserted through the distal lumen and  
114 the Swan-Ganz removed. The pulmonary artery pressure monitors, attached to the distal end  
115 of a Delivery Catheter supported by a concentric Stability Sheath, were advanced to the target  
116 location over the guidewire (Figure 1). Pulmonary artery pressure monitors were positioned in  
117 the pulmonary artery or interlobar artery, orientated anterior-posterior and deployed by  
118 withdrawal of release wires attaching the Sensor to the Delivery Catheter (Figure 1). The  
119 Delivery Catheter and the guidewire were removed and a Millar catheter advanced through the  
120 Stability Sheath positioned proximal to the pulmonary artery pressure monitor for device  
121 calibration. Following implantation aspirin (37.5 mg) and clopidogrel (37.5 mg) were  
122 administered for 30 days.

123

#### 124 **Pressure monitor measurements**

125 To ensure resting haemodynamic load, all readings were taken with animals anaesthetised (at  
126 implantation and right heart catheterisation) or sedated (for readings at time-points between  
127 implantation and repeat right heart catheterisation) with intramuscular injection of azaperone  
128 (40 mg/mL at 6 mg/kg). The reader was placed over the pulmonary artery pressure monitor,  
129 signal strength analysed and pulmonary artery pressure measured for 15 seconds.

130

#### 131 **Echocardiography**

132 Echocardiography was performed at baseline and following the induction of pulmonary  
133 hypertension (PH) (6S probe and Logiq E console, GE Healthcare). Images were acquired in  
134 the supine position via a parasternal window.

135

#### 136 **Acute pulmonary hypertension**

137 Following pulmonary artery pressure monitor implantation and calibration, thromboxane A<sub>2</sub>  
138 agonist (TxA<sub>2</sub>, D0400, Sigma-Aldrich) was infused via the right femoral vein. The dose of  
139 infused TxA<sub>2</sub> was increased at 5-minute intervals as previously described.<sup>21–23</sup> Pulmonary  
140 artery pressure was measured using the implanted pulmonary artery pressure monitor  
141 (Endotronic, USA), fluid filled catheter and Millar catheter.

142

#### 143 **Chronic pulmonary hypertension**

144 Preliminary studies were undertaken to determine the optimal route and dose of monocrotaline  
145 administration (data not shown). Pulmonary artery pressure monitors were implanted 30 days  
146 prior to the induction of PH. At day 0 right heart catheterisation was repeated during which  
147 pressure monitors were calibrated to fluid filled measurements and PH induced by  
148 intraperitoneal administration of monocrotaline 20 mg/kg (Sigma-Aldrich, UK) at day 0 and  
149 haemodynamics assessed by repeat right heart catheterisation at day 30 (60 days after the  
150 implantation of the pulmonary artery pressure monitor).

151

152

153 **Histology**

154 To demonstrate the interaction of the pulmonary artery pressure monitor with the vessel wall,  
155 histological samples were obtained following final catheterisation. As previously described  
156 animals were sedated by intramuscular injection of azaperone (6–8 mg/kg) and euthanised by  
157 intravenous injection of phenobarbital (40 mg/kg) in accordance with The Animals (Scientific  
158 Procedures) Act 1986 under UK Home Office Project License 40/3722.<sup>21</sup> The chest was opened  
159 via a midline thoracotomy and the pleura and pericardium dissected to expose the heart and  
160 great vessels. The inferior vena cava, superior vena cava, and descending aorta were cross-  
161 clamped. Large bore, ridged cannula were placed in the pulmonary artery via an incision in the  
162 right ventricle and the left atrium via an incision in the left atrial appendage and secured with  
163 umbilical tape. The lungs were flushed with 3 L of 0.9% NaCl and perfusion fixed in 10%  
164 formalin. The heart and lungs were removed en-bloc, the airways filled with formalin and the  
165 sections suspended in 10% formalin for two weeks. Histological sections were dissected  
166 anatomically and preserved in 70% ethanol. Tissue sections were cut post-fixation, dehydrated  
167 in graded alcohols, and paraffin embedded. Five micrometer sections were mounted and  
168 stained with hematoxylin and eosin (H&E) and Verhoeff-van Gieson (VVG) to demonstrate the  
169 pulmonary artery pressure Sensor and anchors *in situ*. Images were acquired on an inverted  
170 light microscope (Olympus BX41) with a Leica camera analysis performed using Leica.

171

172 **Micro CT and Faxitron**

173 After tissue fixation, microCT of pressure monitor and surrounding vessel was performed and  
174 data 3-D reconstructed (Skyscan 1172, Bruker).

175

176 **Statistical analysis**

177 Data are expressed as mean  $\pm$  S.E.M. with normality of distribution determined by Kolmogorov-  
178 Smirnov test and differences between data sets assessed using paired or unpaired student t-  
179 test or Mann-Whitney (unpaired) or Wilcoxon (paired) as appropriate in Prism 6.0 for Macintosh  
180 (GraphPad Software).

181 **Results:**

182

183 **Safety**

184 No implant related adverse events were identified. Specifically, there was no evidence of  
185 perforation or dissection and no thrombus formation was identified angiographically or  
186 histologically.

187

188 **Implantable sensor provides accurate, acute measurement of pulmonary artery pressure**

189 To determine the accuracy of the implanted pulmonary artery pressure monitor-derived, and  
190 reference catheter, pressure readings were made during the induction of acute PH in two  
191 Yorkshire White Swine. Real-time pulmonary artery pressure readings made by implanted  
192 pulmonary artery pressure monitor and gold standard Millar catheter were well matched (Figure  
193 2A). Over a physiological range, pressure measured by implanted pulmonary artery pressure  
194 monitor and reference catheter was concordant with a bias of -0.43 (2.5 S.D., 95% CI -5.3 -  
195 4.4, Figure 2B) demonstrating accurate acute measurement of pulmonary artery pressure.

196

197 **Intraperitoneal administration of monocrotaline results in chronic pulmonary**  
198 **hypertension and right heart failure**

199 To determine long-term vascular compatibility and accuracy of pressure readings PH was  
200 induced in six animals by i.p. administration of monocrotaline MCT (20mg/kg). Five control  
201 animals were administered 0.9% normal saline solution. Administration of MCT led to  
202 increased dyspnoea, lethargy (subjective), and the development of dilated ear and abdominal  
203 veins. Consistent with increased pulmonary artery pressures, pulmonary artery acceleration  
204 time (PAAT) was decreased at day 30 (Figure 3A). This finding was confirmed by right heart  
205 catheterisation at day 30 demonstrated increased systolic pulmonary artery pressure in MCT  
206 treated animals compared to saline treated animals (23.1 +/- 1.0 vrs 31.74 +/- 1.4,  $p < 0.01$ )  
207 and compared to day 0 measurements in MCT treated animals (20.7 +/- 0.4 vrs 31.74 +/- 1.4,  
208  $p < 0.01$ , Figure 3B). Furthermore, histological examination of the lungs demonstrated  
209 thickened, remodelled small pulmonary arterioles and examination of the liver demonstrated



210 zone 2 and 3 acinus congestion with hepatocellular dropout, in keeping with the development  
211 of PH and right ventricular failure in MCT treated animals (Figure 3C).

212

213 **Implantable sensor stability and long-term pulmonary artery pressure measurement**

214 Pulmonary artery pressure monitor position remained stable throughout the study with no  
215 identifiable longitudinal migration or rotation and no structural defect of the device (Figure 4).

216 which was fully endothelialised (Figure 5). The increased pulmonary artery pressures

217 measured by fluid filled catheter matched those measured by implanted pulmonary artery

218 pressure monitor at day 0 and day 30 (Figure 3B). Pulmonary artery pressure monitor derived

219 readings at day 15 to day 30 demonstrated a progressive increase in systolic pulmonary artery

220 pressure (Figure 3B).

221

222

223 **Discussion:**

224

225 The present study demonstrates the pre-clinical safety, vascular compatibility and accuracy of  
226 a novel telemetry based pulmonary artery pressure monitor system in acute and chronic large  
227 animal models of PH. Real-time pressure wave form traces were well matched to gold-standard  
228 reference catheter measurements, and device-measured pressure readings tracked the  
229 development of disease in chronic models over a 30-day period.

230

231 Right heart catheterisation is an essential diagnostic investigation of patients with suspected  
232 pulmonary hypertension and may be used in selected patients to assess the response to  
233 treatment or guide the requirement for advanced therapies or transplantation. Beyond a  
234 diagnostic role, haemodynamic parameters aid risk stratification of patients with PAH and guide  
235 choice of therapy.<sup>2,4,24</sup> Therapeutic options for patients with PAH and CTEPH have expanded  
236 over recent years, however beyond those with an acute vasodilator response who have  
237 excellent survival with calcium channel antagonists,<sup>25</sup> there is little to guide physicians to which  
238 drugs may be best suited to individual patients and limited evidence based means by which to  
239 determine response to therapy.<sup>2</sup> Options for patients with other forms of PH are limited.

240

241 PAH specific therapies alter pulmonary haemodynamics including mean pulmonary artery  
242 pressure. Pooled patient-level analysis of clinical trial data have demonstrated that changes in  
243 pulmonary haemodynamics, with knowledge of treatment allocation, is predictive of clinical  
244 events.<sup>10</sup> The development of implantable pulmonary artery pressure monitors offers the  
245 potential to determine pulmonary artery pressure with greater frequency than previously  
246 possible without the need for invasive catheterisation. In patients with heart failure due to left  
247 heart disease the benefit of haemodynamic parameter-guided therapy has been studied and  
248 elevation of cardiac filling pressures has been shown to precede clinical events by  $\geq 1$  to 2  
249 weeks.<sup>11,12</sup> More recently, early identifiable physiological changes have been detected using  
250 implantable pulmonary artery pressure monitors and proactive pressure-guided heart failure  
251 management has been demonstrated to reduce hospitalisation in comparison to standard care  
252 in patients with heart failure and those with heart failure and coexisting lung disease.<sup>13-15</sup> As

253 such it is possible that pulmonary artery pressure monitoring and proactive pressure-guided  
254 heart failure management may provide benefits to groups of patients with PH without currently  
255 approved therapies. In patients with all forms of PH, changes in haemodynamics may be driven  
256 by a range of factors such as pulmonary vascular remodeling and constriction, fluid status,  
257 hypoxia, infection, therapeutic adherence, drug interactions or physical activity. Remote  
258 monitoring of PA pressure and additional parameters used in routine clinical practice has the  
259 potential to facilitate differentiation of cause of decompensation, aiding instigation of  
260 appropriate, timely management.<sup>26</sup>

261

262

263 Furthermore, there is limited long-term data on variability of pulmonary artery pressure in  
264 patients with PAH.<sup>27</sup> Factors such as patient position and haemodynamic loading,<sup>28-30</sup>  
265 hypoxia<sup>31</sup> and exercise<sup>32,33</sup> have been shown to alter pulmonary artery pressure in short-term  
266 studies. The development of pulmonary artery pressure monitors that provide long-term  
267 haemodynamic data provides an opportunity to investigate physiological and clinical questions  
268 essential to the understanding of disease and provides the opportunity to assess therapeutic  
269 interventions in clinical studies of novel agents.

270

## 271 **Acknowledgements**

272

## 273 **Conflicts and disclosures**

274 AR has consulted for Endotronix.

275

## 276 **Sources of funding**

277 Wellcome Trust Clinical Research Career Development Fellowship (AR: 206632/Z/17/Z,  
278 AS:205188/Z/16/Z), MRC Clinical Research Training Fellowship (AR: MR/K002406/1),  
279 EPSRC/HEFCE IIKE award (AR, AS, AL, JG) and a British Heart Foundation Senior Basic  
280 Scientist Fellowship (AL: FS/13/48/30453) award. Catheters and implants were provided by  
281 Endotronix via an External Research Program award (AR).

282



284 **References**

- 285 1. Kiely, D. G., Elliot, C. A., Sabroe, I. & Condliffe, R. Pulmonary hypertension: diagnosis  
286 and management. *Br. Med. J.* 346–357 (2013). doi:10.1136/bmj.f2028
- 287 2. Galie, N. *et al.* 2015 ESC/ERS Guidelines for the diagnosis and treatment of  
288 pulmonary hypertension: The Joint Task Force for the Diagnosis and Treatment of  
289 Pulmonary Hypertension of the European Society of Cardiology (ESC) and the  
290 European Respiratory Society (ERS): Endor. *Eur. Heart J.* **37**, 67–119 (2015).
- 291 3. Simonneau, G. *et al.* Haemodynamic definitions and updated clinical classification of  
292 pulmonary hypertension. *Eur. Respir. J.* (2019). doi:10.1183/13993003.01913-2018
- 293 4. Weatherald, J. *et al.* Prognostic value of follow-up hemodynamic variables after initial  
294 management in pulmonary arterial hypertension. *Circulation* **137**, 693–704 (2018).
- 295 5. Pulido, T. *et al.* Macitentan and Morbidity and Mortality in Pulmonary Arterial  
296 Hypertension. *N. Engl. J. Med.* **369**, 809–818 (2013).
- 297 6. Sitbon, O. *et al.* Selexipag for the treatment of pulmonary arterial hypertension. *N.*  
298 *Engl. J. Med.* **373**, 2522–33 (2015).
- 299 7. Hassoun, P. M. *et al.* Updating Clinical Endpoint Definitions. *Pulm. Circ.* **3**, 206–216  
300 (2014).
- 301 8. Parikh, K. S. *et al.* Use of outcome measures in pulmonary hypertension clinical trials.  
302 *Am. Heart J.* **170**, 419-429.e3 (2015).
- 303 9. Lewis, R. A. *et al.* Identification of cardiac magnetic resonance imaging thresholds for  
304 risk stratification in pulmonary arterial hypertension. *Am. J. Respir. Crit. Care Med.*  
305 **201**, 458–466 (2020).
- 306 10. Ventetuolo, C. E. *et al.* Are hemodynamics surrogate end points in pulmonary arterial  
307 hypertension? *Circulation* **130**, 768–775 (2014).
- 308 11. Zile, M. R. *et al.* Transition from chronic compensated to acute d compensated heart  
309 failure: Pathophysiological insights obtained from continuous monitoring of intracardiac  
310 pressures. *Circulation* (2008). doi:10.1161/CIRCULATIONAHA.108.783910
- 311 12. Adamson, P. B. Pathophysiology of the transition from chronic compensated and  
312 acute decompensated heart failure: New insights from continuous monitoring devices.  
313 *Current Heart Failure Reports* (2009). doi:10.1007/s11897-009-0039-z
- 314 13. Abraham, W. T. *et al.* Sustained efficacy of pulmonary artery pressure to guide  
315 adjustment of chronic heart failure therapy: Complete follow-up results from the  
316 CHAMPION randomised trial. *Lancet* **387**, 453–461 (2016).
- 317 14. Abraham, W. T. *et al.* Wireless pulmonary artery haemodynamic monitoring in chronic  
318 heart failure: A randomised controlled trial. *Lancet* **377**, 658–666 (2011).
- 319 15. Adamson, P. B. *et al.* Wireless pulmonary artery pressure monitoring guides  
320 management to reduce decompensation in heart failure with preserved ejection  
321 fraction. *Circ. Hear. Fail.* **7**, 935–944 (2014).
- 322 16. Cowie, M. R., Simon, M., Klein, L. & Thokala, P. The cost-effectiveness of real-time  
323 pulmonary artery pressure monitoring in heart failure patients: a European  
324 perspective. *Eur. J. Heart Fail.* (2017). doi:10.1002/ejhf.747
- 325 17. Desai, A. S. *et al.* Reduction in Heart Failure Hospitalizations With Ambulatory  
326 Hemodynamic Monitoring Seen in Clinical Trials Is Maintained in the &#039;Real

- 327 World#039; *J. Am. Coll. Cardiol.* (2017).
- 328 18. NHS. Commissioning Policy : Targeted Therapies for use in Pulmonary Hypertension  
329 in Adults.
- 330 19. Galiè, N. *et al.* Initial Use of Ambrisentan plus Tadalafil in Pulmonary Arterial  
331 Hypertension. *N. Engl. J. Med.* **373**, 834–844 (2015).
- 332 20. Zucker, M. J. Rebuttal From Dr Zucker. *Chest* (2017). doi:10.1016/j.chest.2016.12.012
- 333 21. Rothman, A. M. K. *et al.* Pulmonary Artery Denervation Reduces Pulmonary Artery  
334 Pressure and Induces Histological Changes in an Acute Porcine Model of Pulmonary  
335 Hypertension. *Circ. Cardiovasc. Interv.* **8**, (2015).
- 336 22. Rothman, A. M. K. *et al.* Pulmonary Artery Denervation Using Catheter-based  
337 Ultrasonic Energy. *EuroIntervention* (2019). doi:10.4244/EIJ-D-18-01082
- 338 23. Roehl, A. B. *et al.* Comparison of 3 methods to induce acute pulmonary hypertension  
339 in pigs. *Comp. Med.* **59**, 280–286 (2009).
- 340 24. Weatherald, J., Boucly, A., Sahay, S., Humbert, M. & Sitbon, O. The low-risk profile in  
341 pulmonary arterial hypertension: Time for a paradigm shift to goal-oriented clinical trial  
342 endpoints? *Am. J. Respir. Crit. Care Med.* **197**, 860–868 (2018).
- 343 25. Sitbon, O. *et al.* Long-Term Response to Calcium Channel Blockers in Idiopathic  
344 Pulmonary Arterial Hypertension. 3105–3112 (2005).  
345 doi:10.1161/CIRCULATIONAHA.104.488486
- 346 26. Mullins, W., Sharif, F., Dupont, M., Rothman, A. M. K. & Wijns, W. Digital Health Care  
347 Solution for Proactive Heart Failure Management with the Cordella Heart Failure  
348 System : Results of the SIRONA First-in-Human Study. *Eur. J. Heart Fail.*
- 349 27. Rich, S., D'alonzo, G. E., Dantzker, D. R. & Levy, P. S. Magnitude and implications of  
350 spontaneous hemodynamic variability in primary pulmonary hypertension. *Am. J.*  
351 *Cardiol.* (1985). doi:10.1016/0002-9149(85)90319-4
- 352 28. Woods, S. L. & Mansfield, L. W. Effect of body position upon pulmonary artery and  
353 pulmonary capillary wedge pressures in noncritically ill patients. *Hear. Lung* (1976).
- 354 29. Driscoll, A., Shanahan, A., Crommy, L., Foong, S. & Gleeson, A. The effect of patient  
355 position on the reproducibility of cardiac output measurements. *Hear. Lung - J. Acute*  
356 *Crit. Care* (1995). doi:10.1016/S0147-9563(05)80093-7
- 357 30. Mekiš, D. & Kamenik, M. Infl uence of body position on hemodynamics in patients with  
358 ischemic heart disease undergoing cardiac surgery. *Wien. Klin. Wochenschr.* (2010).  
359 doi:10.1007/s00508-010-1346-9
- 360 31. Ghofrani, H. A. *et al.* Hypoxia- and non-hypoxia-related pulmonary hypertension -  
361 Established and new therapies. *Cardiovascular Research* (2006).  
362 doi:10.1016/j.cardiores.2006.07.025
- 363 32. Naeije, R. *et al.* Exercise-Induced Pulmonary Hypertension: Translating  
364 Pathophysiological Concepts Into Clinical Practice. *Chest* (2018).  
365 doi:10.1016/j.chest.2018.01.022
- 366 33. Raeside, D. A., Chalmers, G., Clelland, J., Madhok, R. & Peacock, A. J. Pulmonary  
367 artery pressure variation in patients with connective tissue disease: 24 hour  
368 ambulatory pulmonary artery pressure monitoring. *Thorax* (1998).  
369 doi:10.1136/thx.53.10.857

370

371

372

373 **Figure 1.** Representative fluoroscopic images of implantation. A) Implant at the target delivery  
374 location. The radiopaque markers on the implant body shows implant orientation within the  
375 vessel. B) Implant post-deployment with engaged anchors.

376



377

378 **Figure 2.** A) Pressure waveforms measured with the reference invasive pressure measurement  
379 (Millar) and the Sensor. B) Bland-Altman plot showing Millar and ETX pressure measurements.

380

381

382 **Figure 3.** A) Representative Doppler echocardiography images of pulmonary artery flow  
383 showing pulmonary artery acceleration time (PAAT) showing decreased PAAT with the  
384 development of PH. B) sPAP measurements using Sensor and fluid-filled catheter over the  
385 course of the study showing chronic increase in sPAP over time (mean +/- S.E.M, \* $p < 0.05$ , \*\*  
386  $p < 0.01$ , Mann-Whitney test or or Wilcoxon test as appropriate). C) Representative  
387 histopathological images of lung and liver sections from control and MCT treated animals.  
388 Administration of MCT resulted in increased small vessel muscularisation of the pulmonary  
389 arteries (Lung - Alcian blue elastic Van Gieson, 20x magnification) and zone 2 and 3 acinus  
390 congestion with hepatocellular dropout, in keeping with the development of PH and right  
391 ventricular failure (Liver – haematoxylin and eosin, 2.5x magnification).

392

393

394 **Figure 4.** A) Micro-CT images of the prototype implant from different views. B) Reconstructed  
395 3D computer model based on the micro-CT images.

396

397 **Figure 5.** Histology. A and B – location of sensor and histological section within the pulmonary  
398 artery. Hematoxylin and eosin (C) and Verhoeff-van Gieson (D) stained sections of sensor body  
399 and anchors demonstrating endothelialisation.

**A**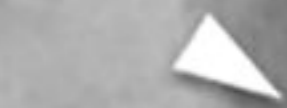**B**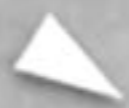

**A**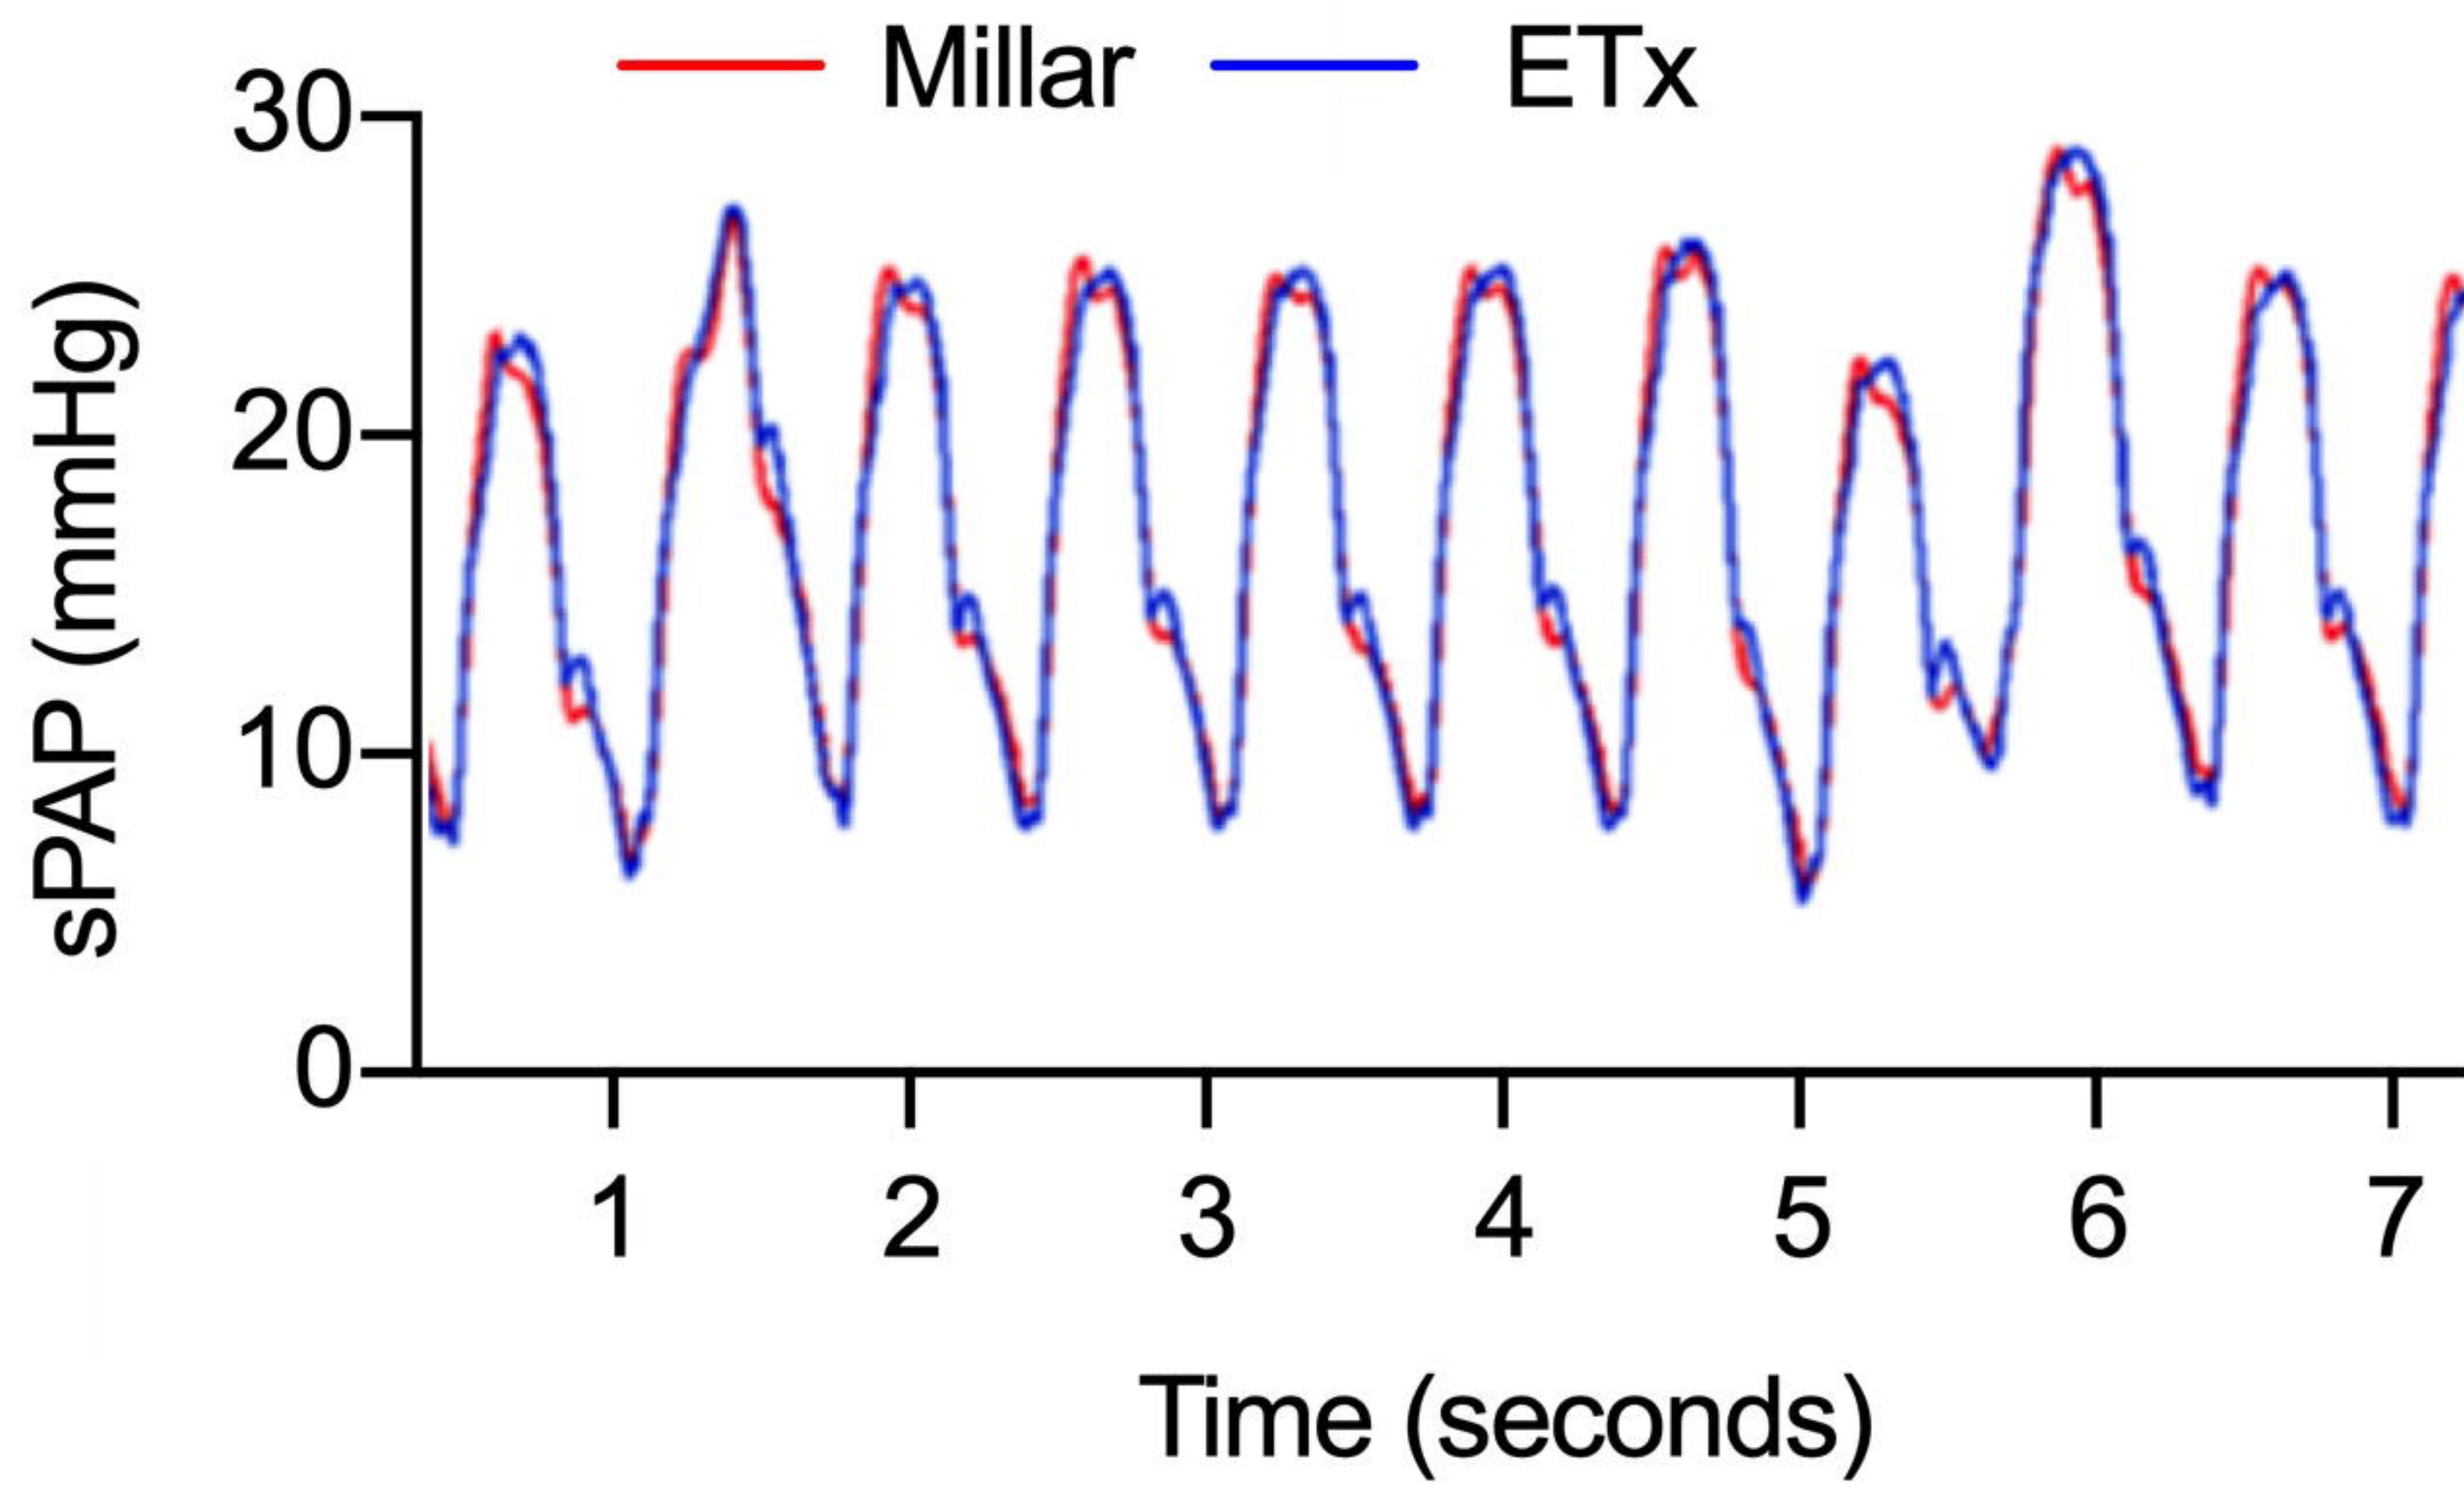**B**

bioRxiv preprint doi: <https://doi.org/10.1101/2020.12.27.424411>; this version posted December 28, 2020. The copyright holder for this preprint (which was not certified by peer review) is the author/funder. All rights reserved. No reuse allowed without permission.

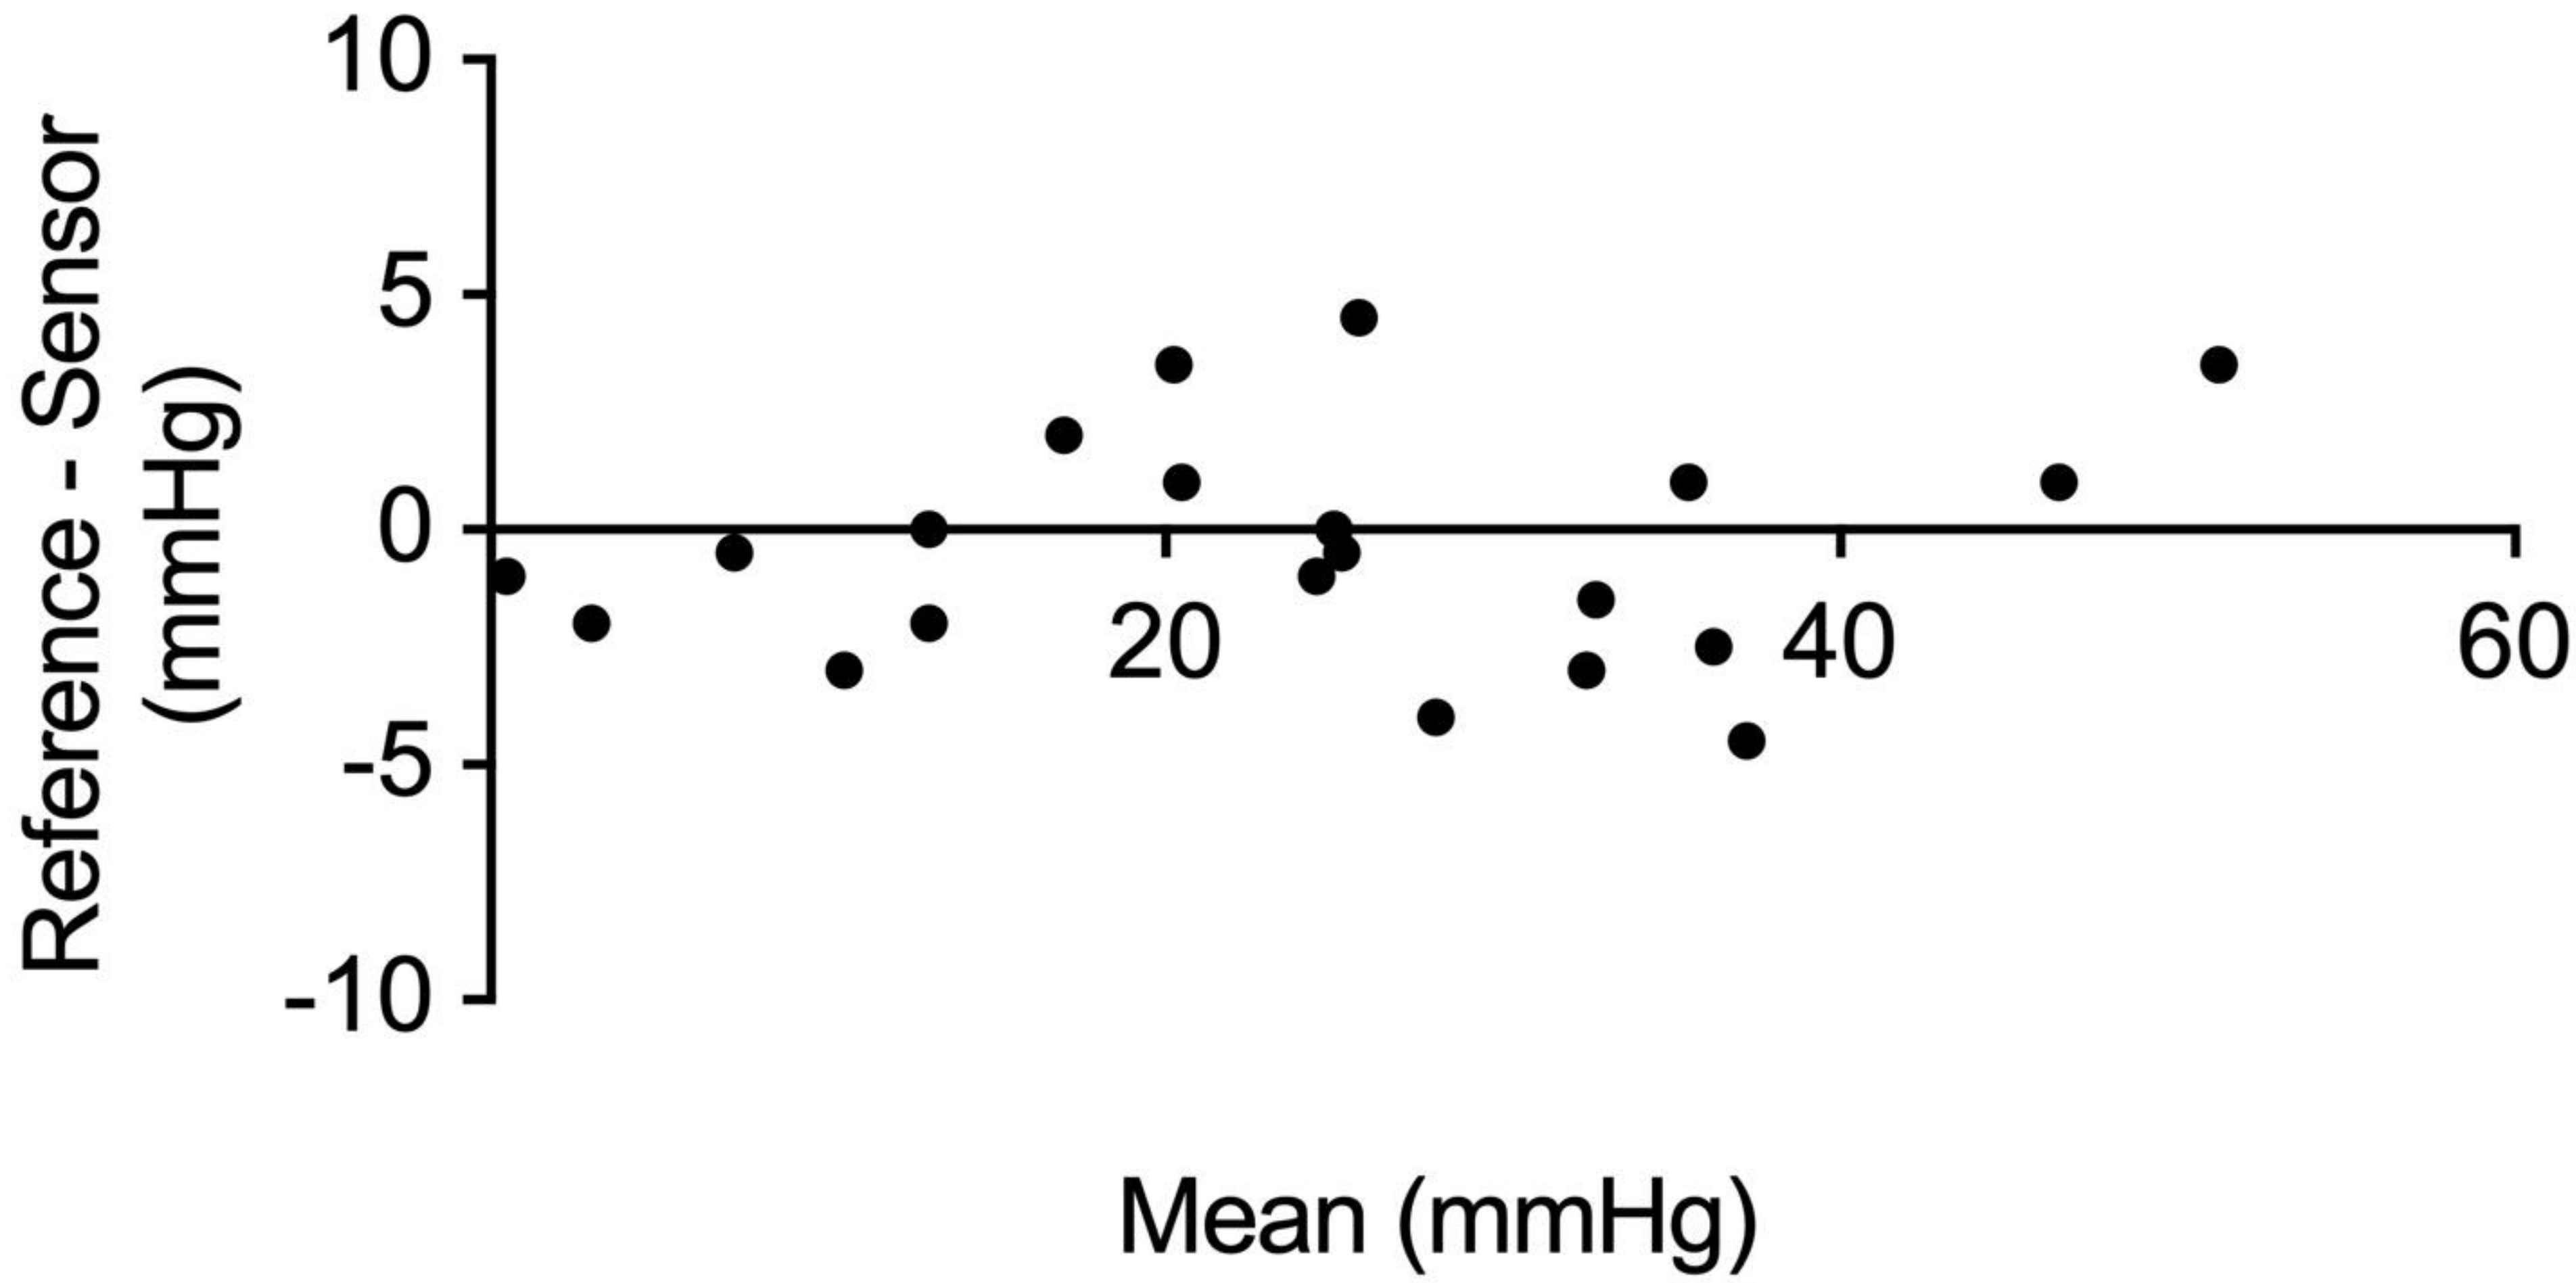

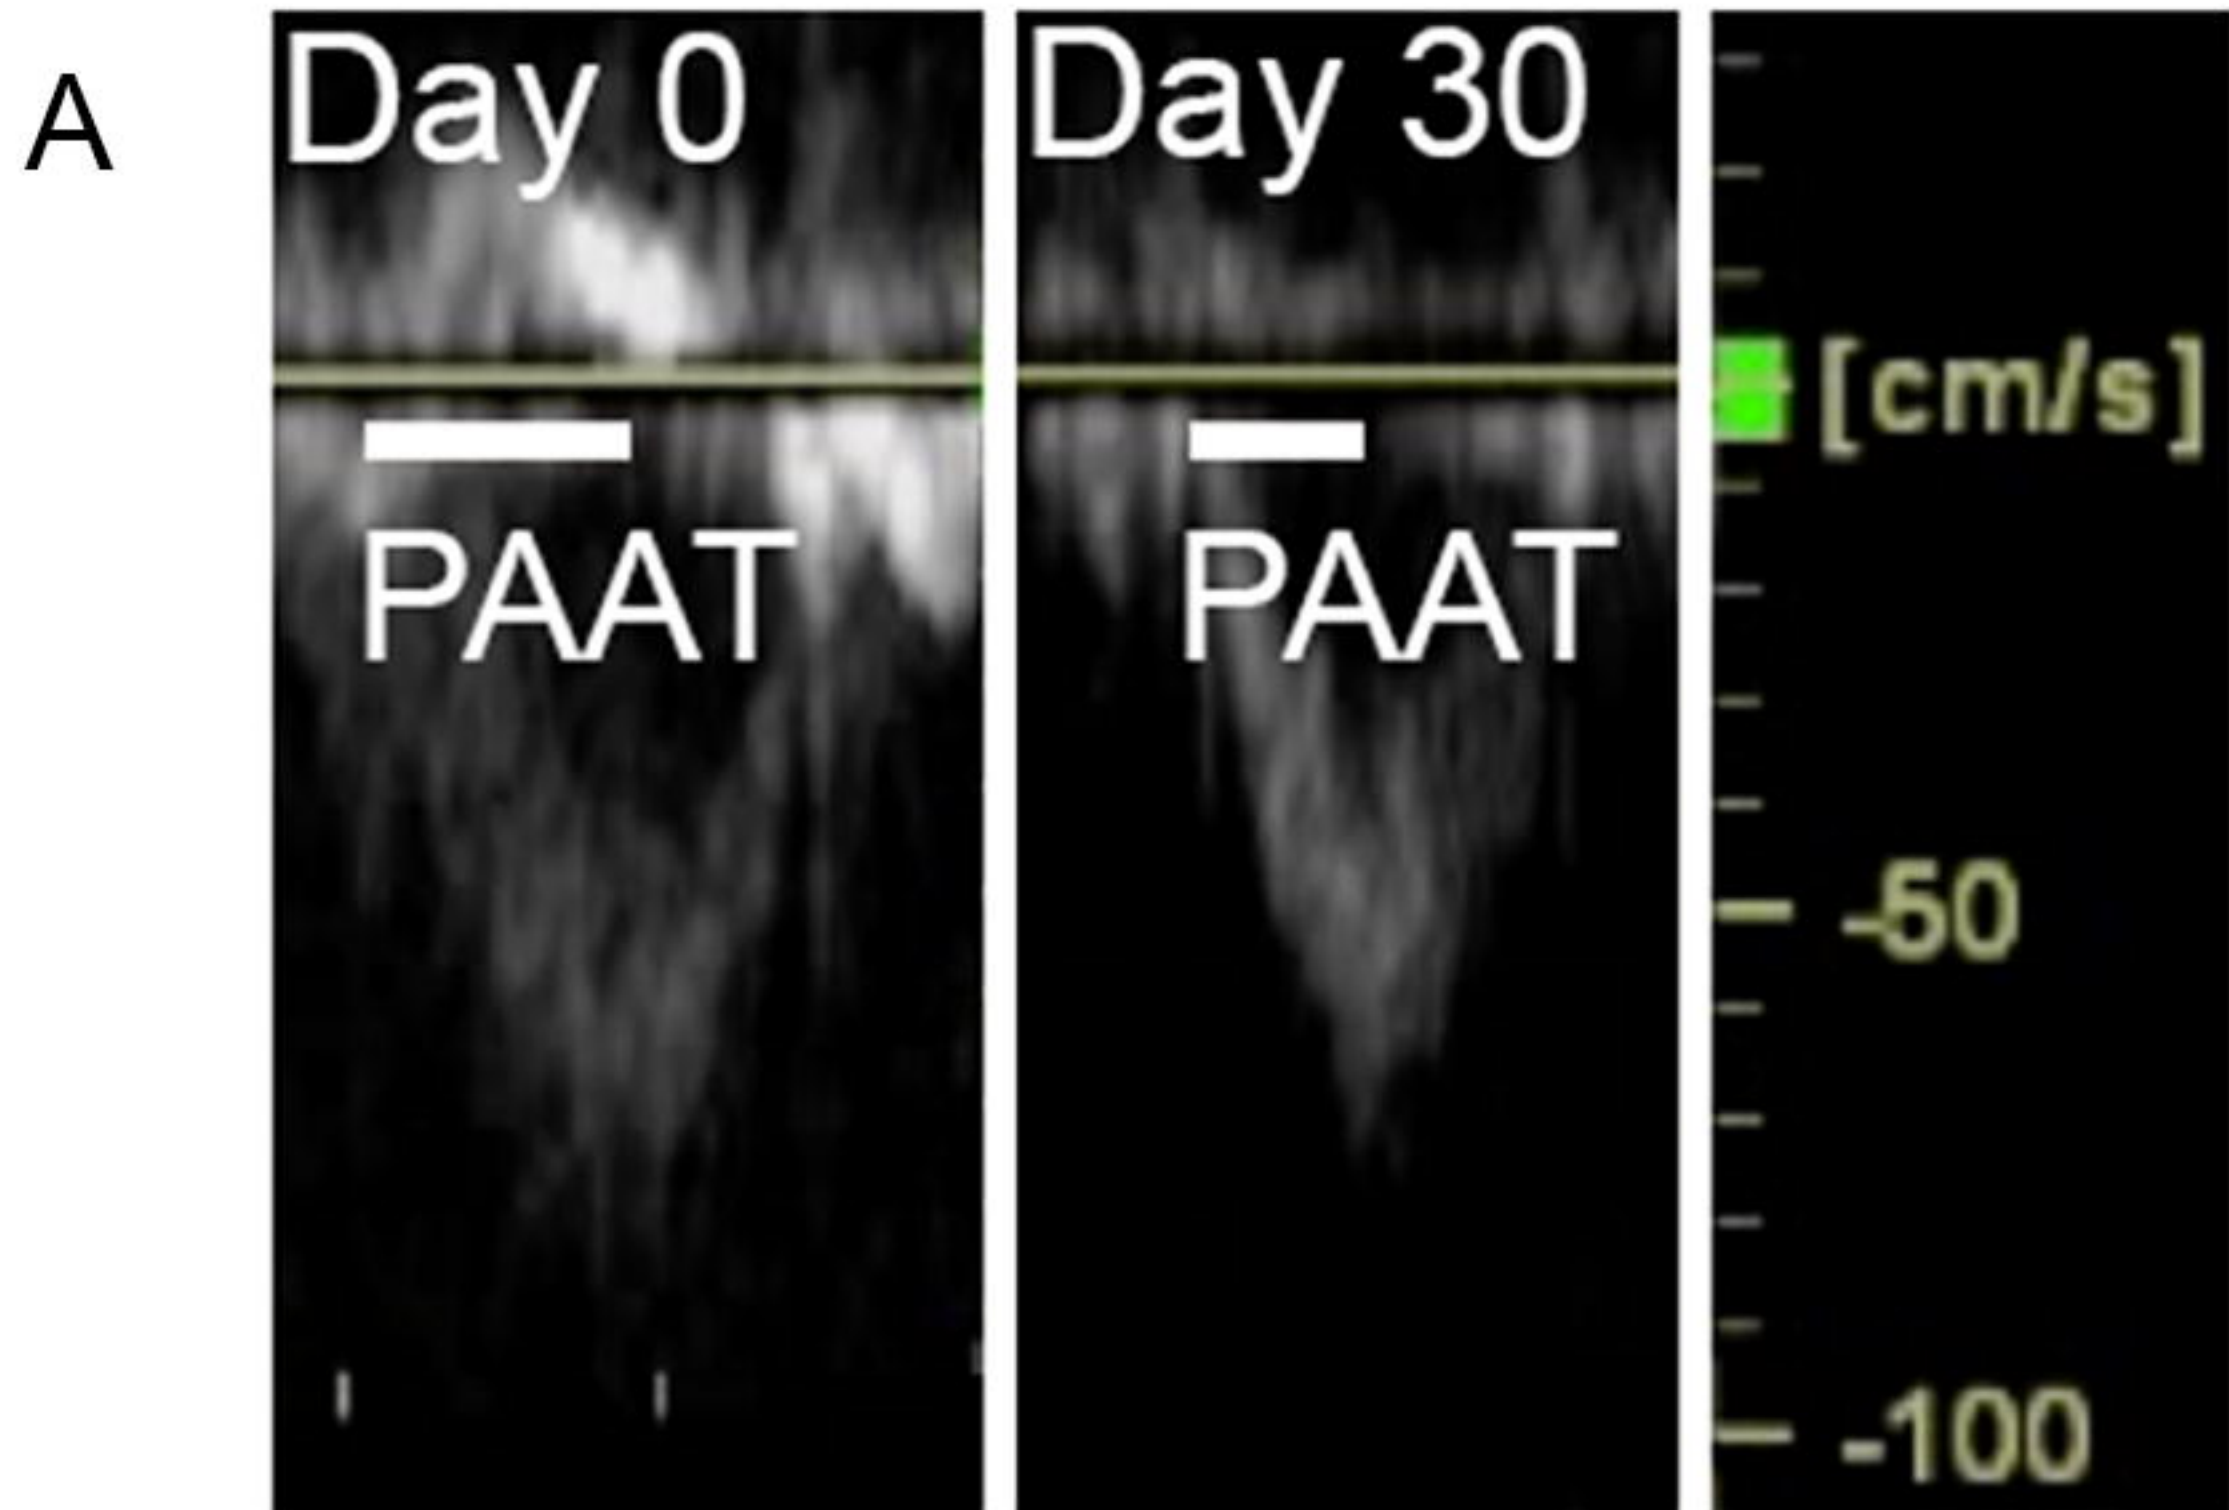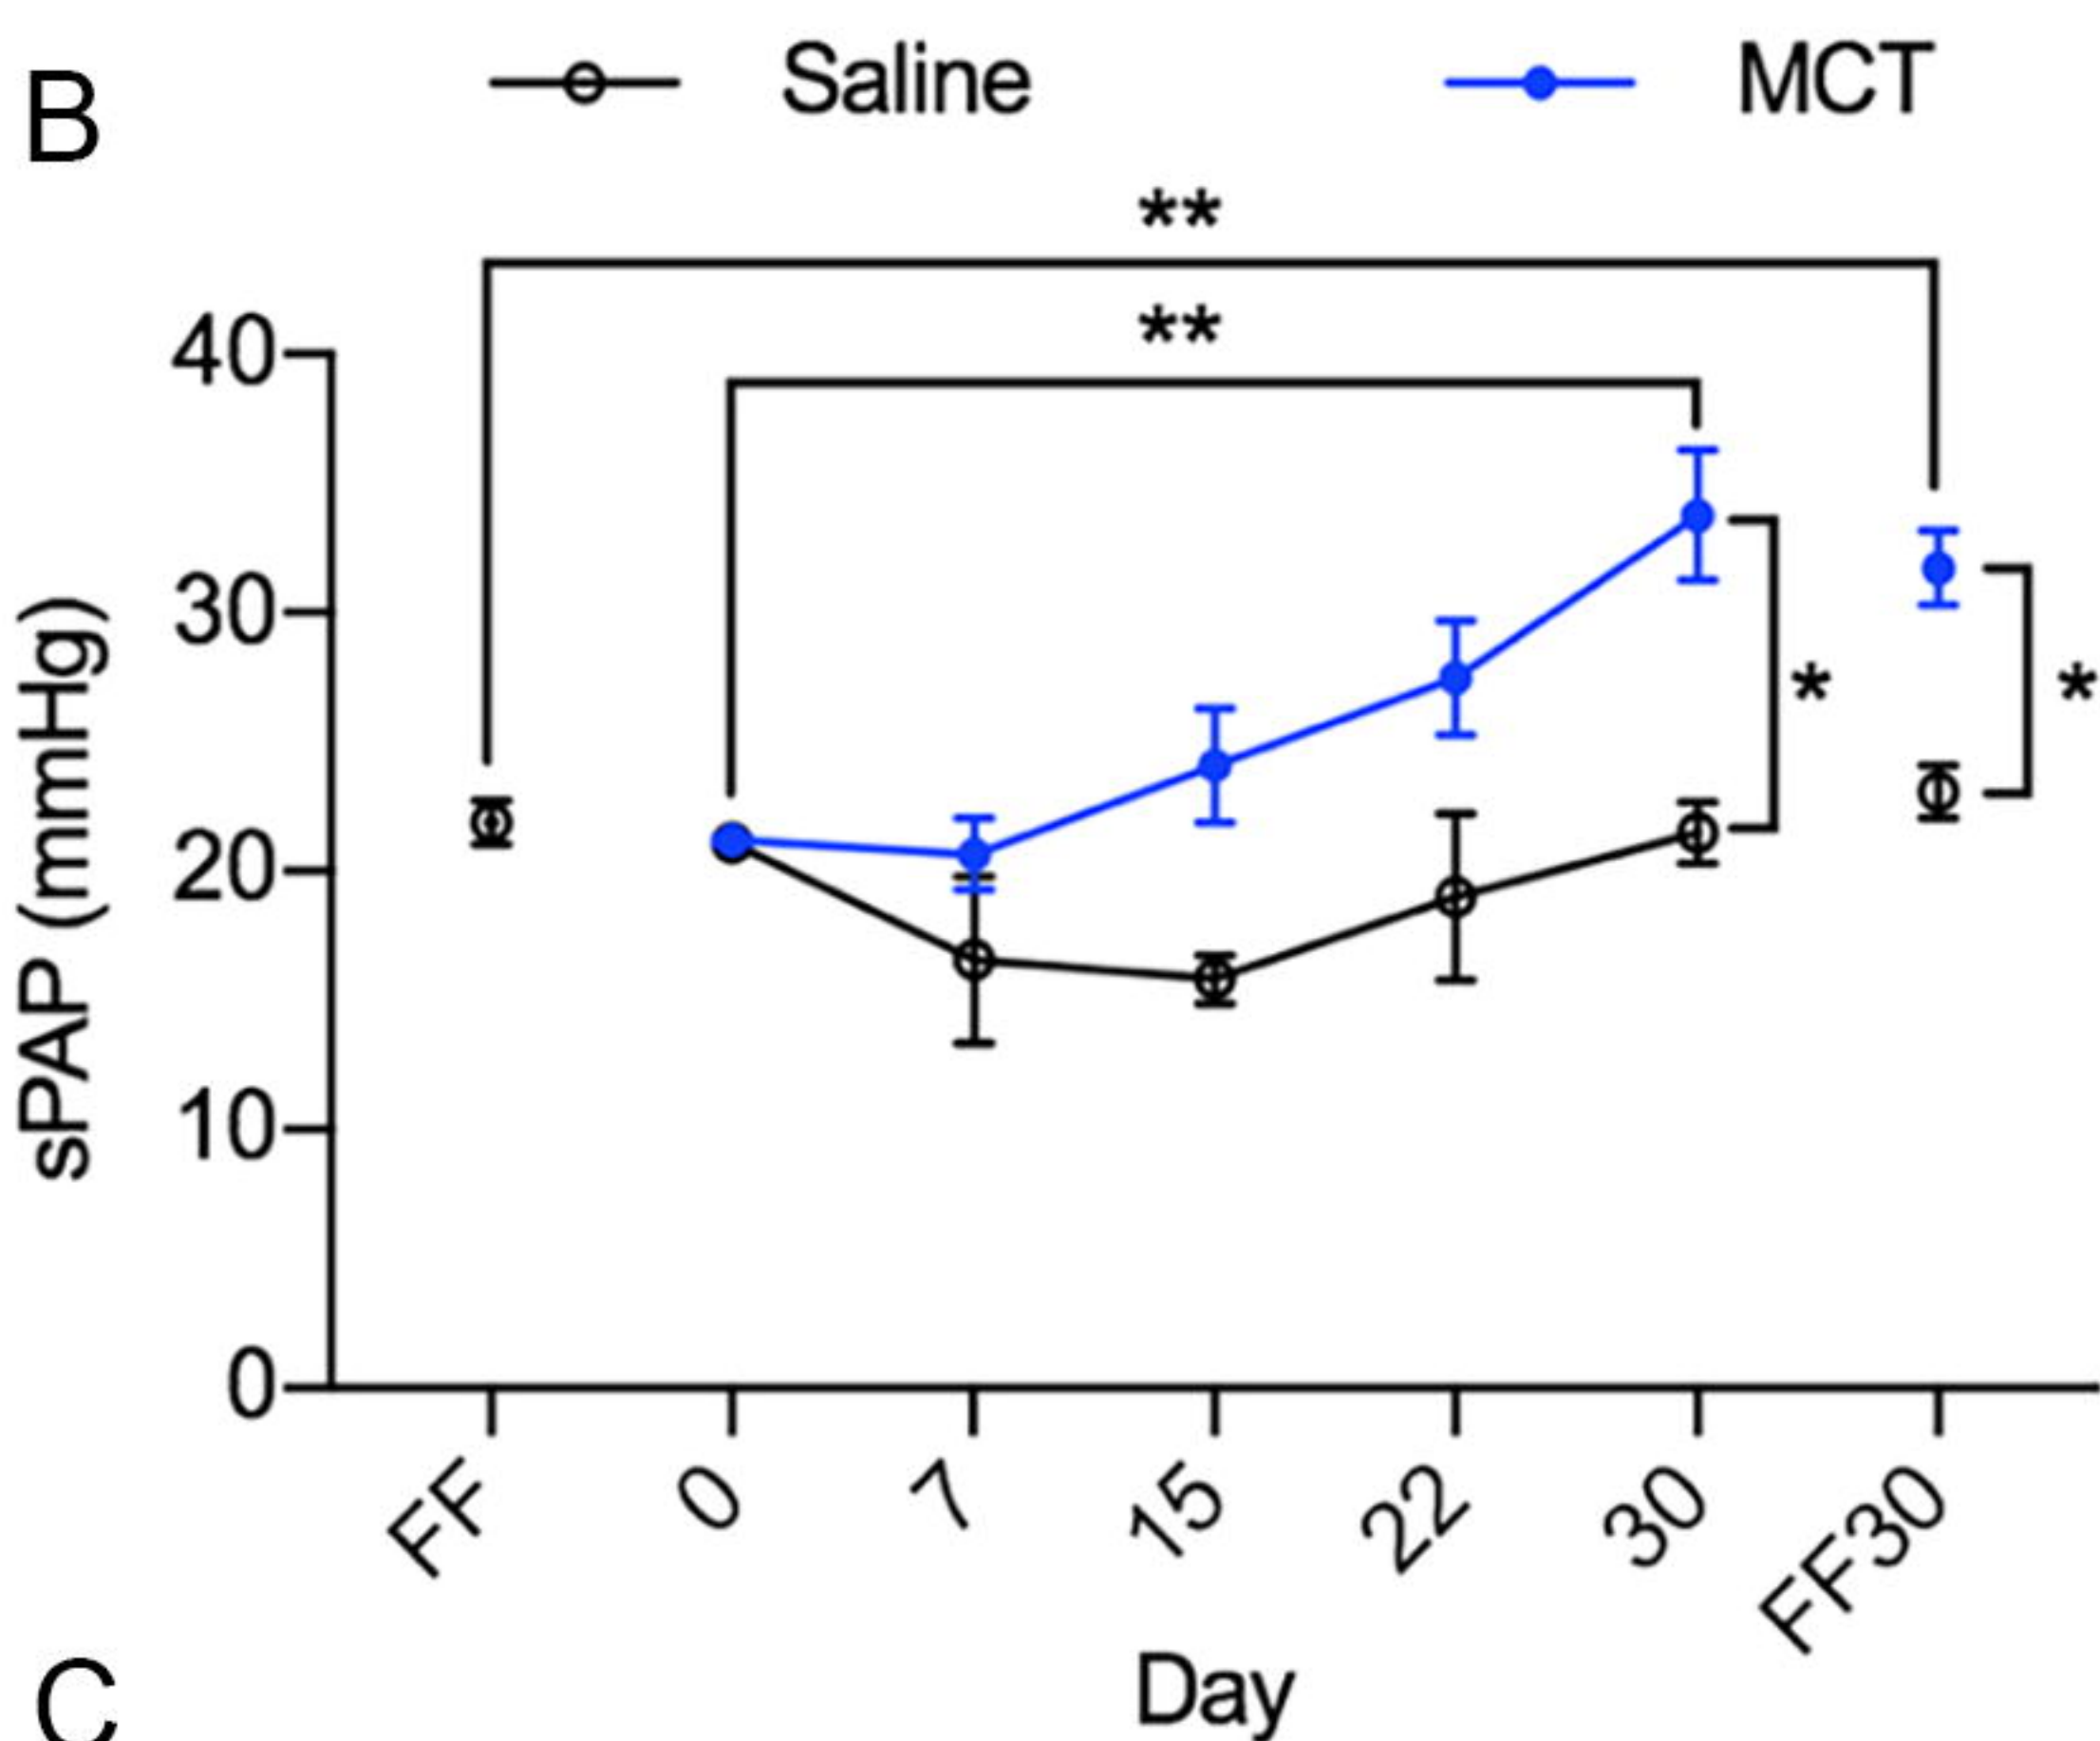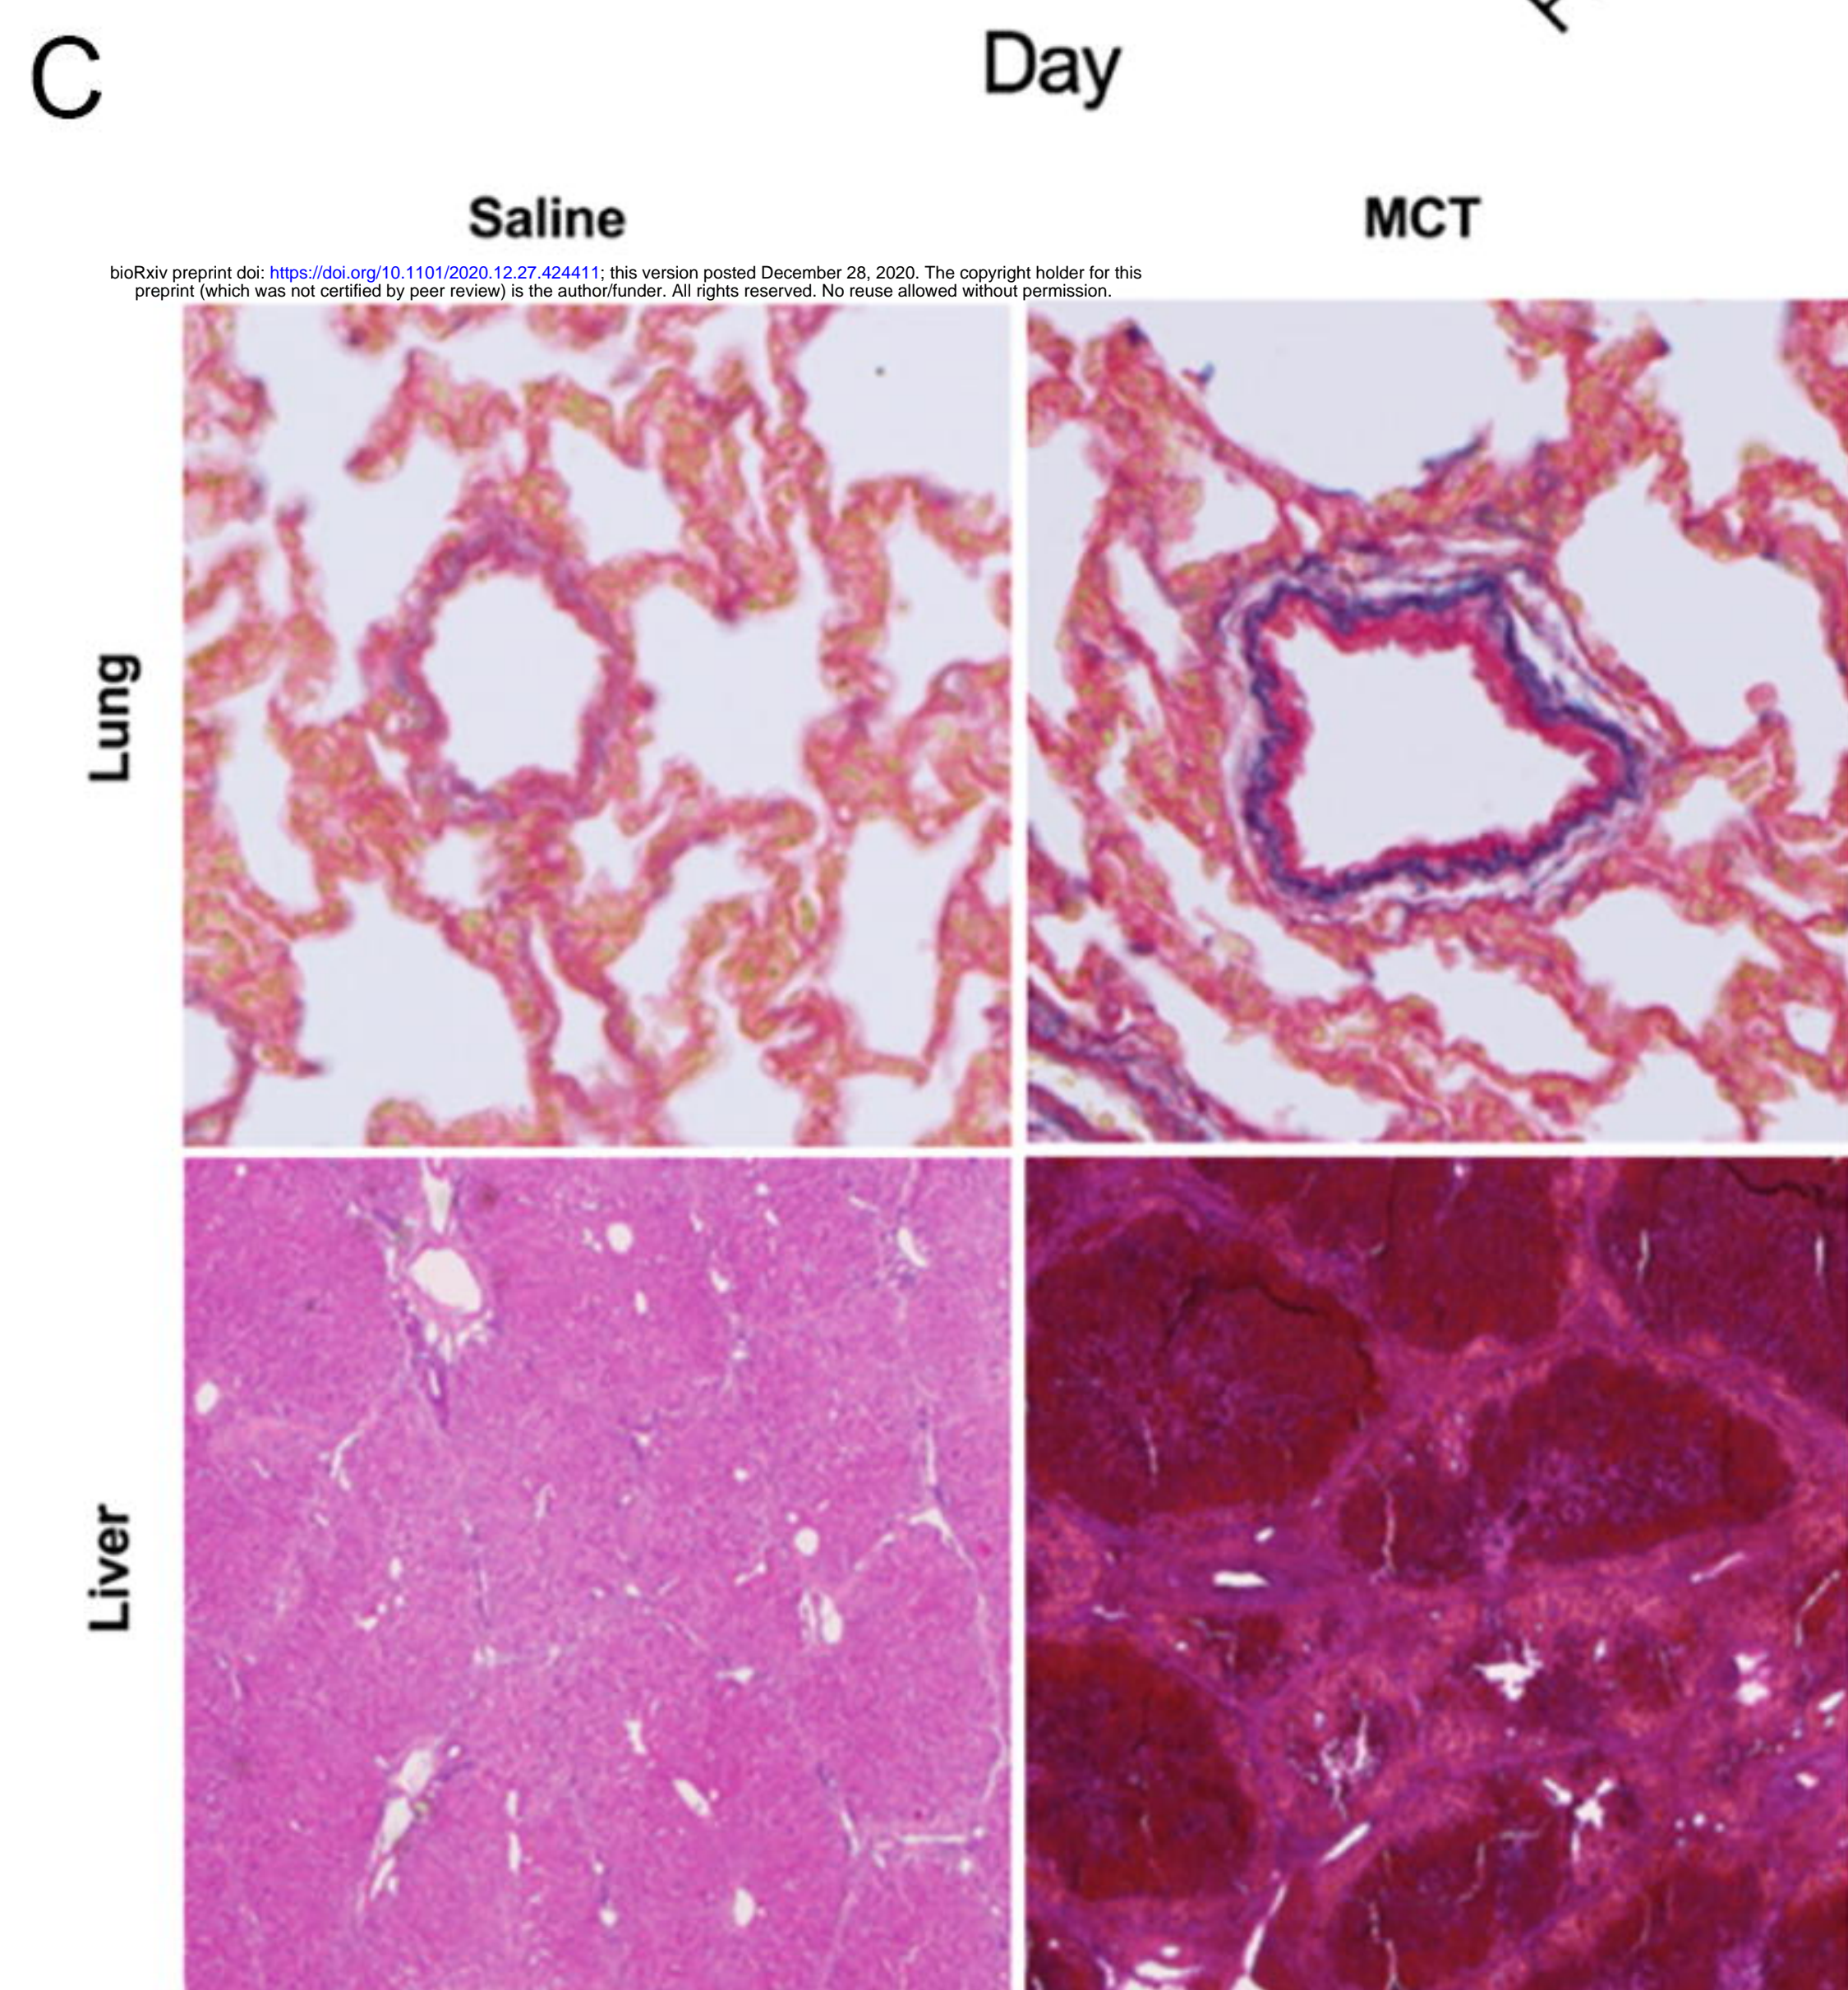

**A**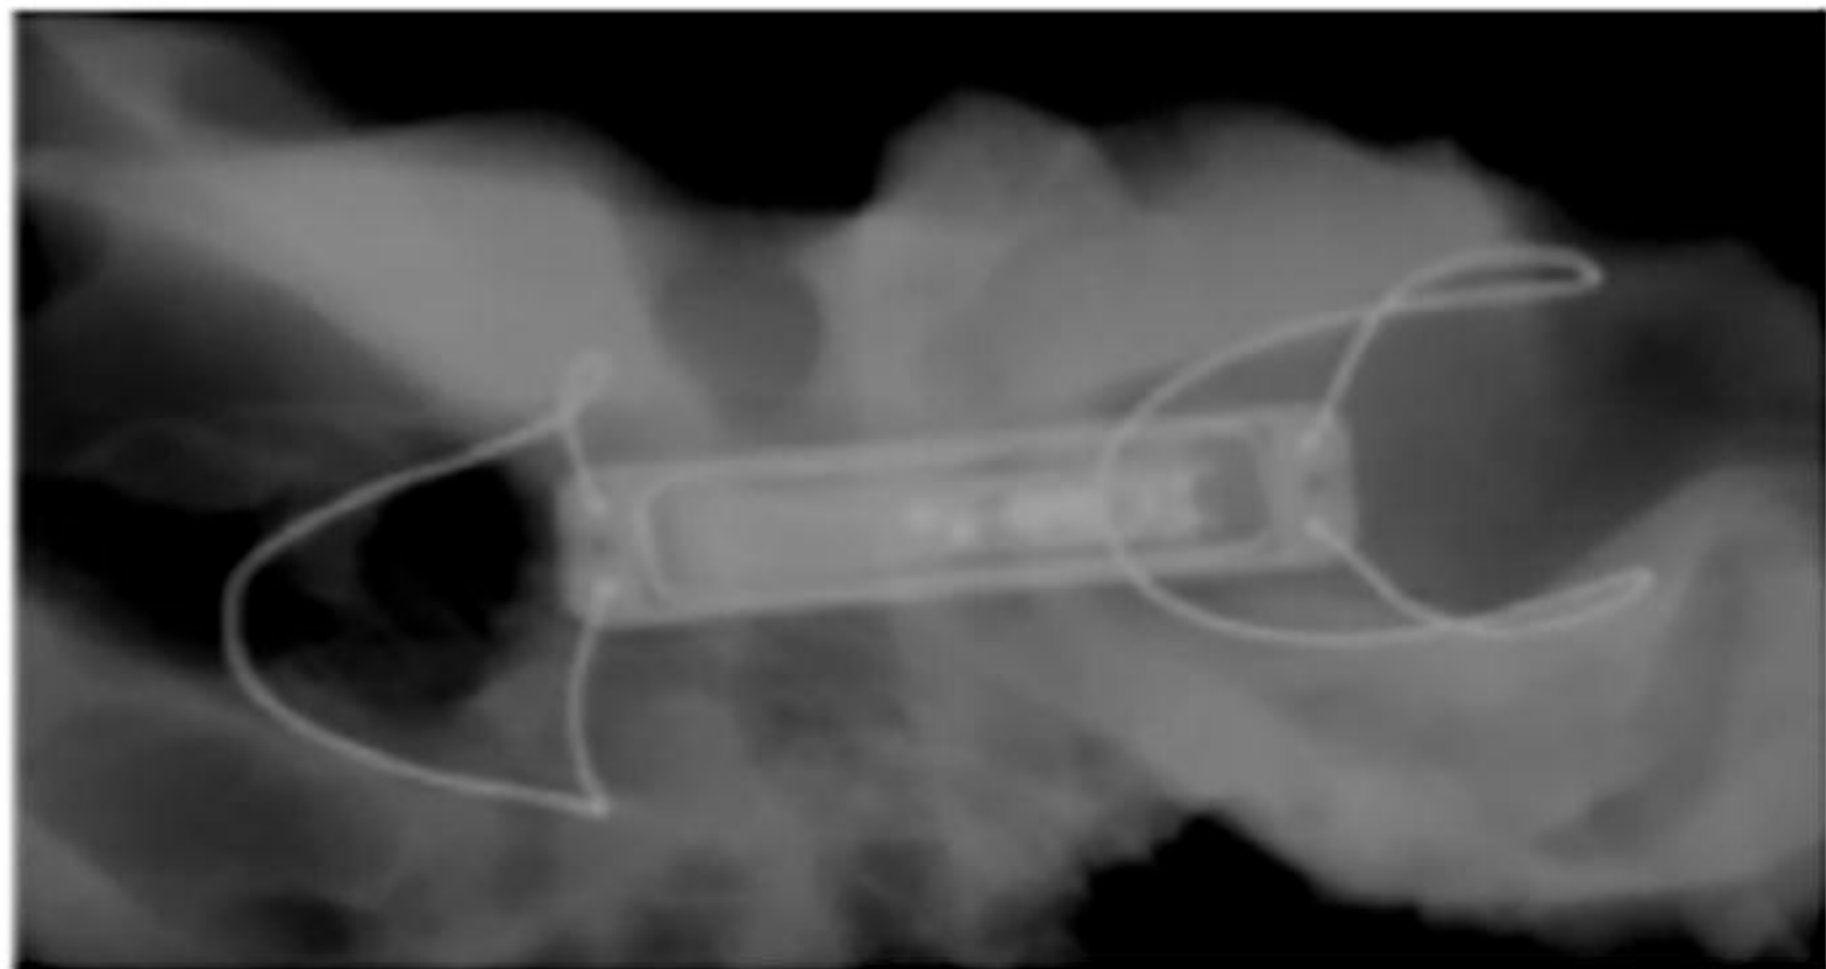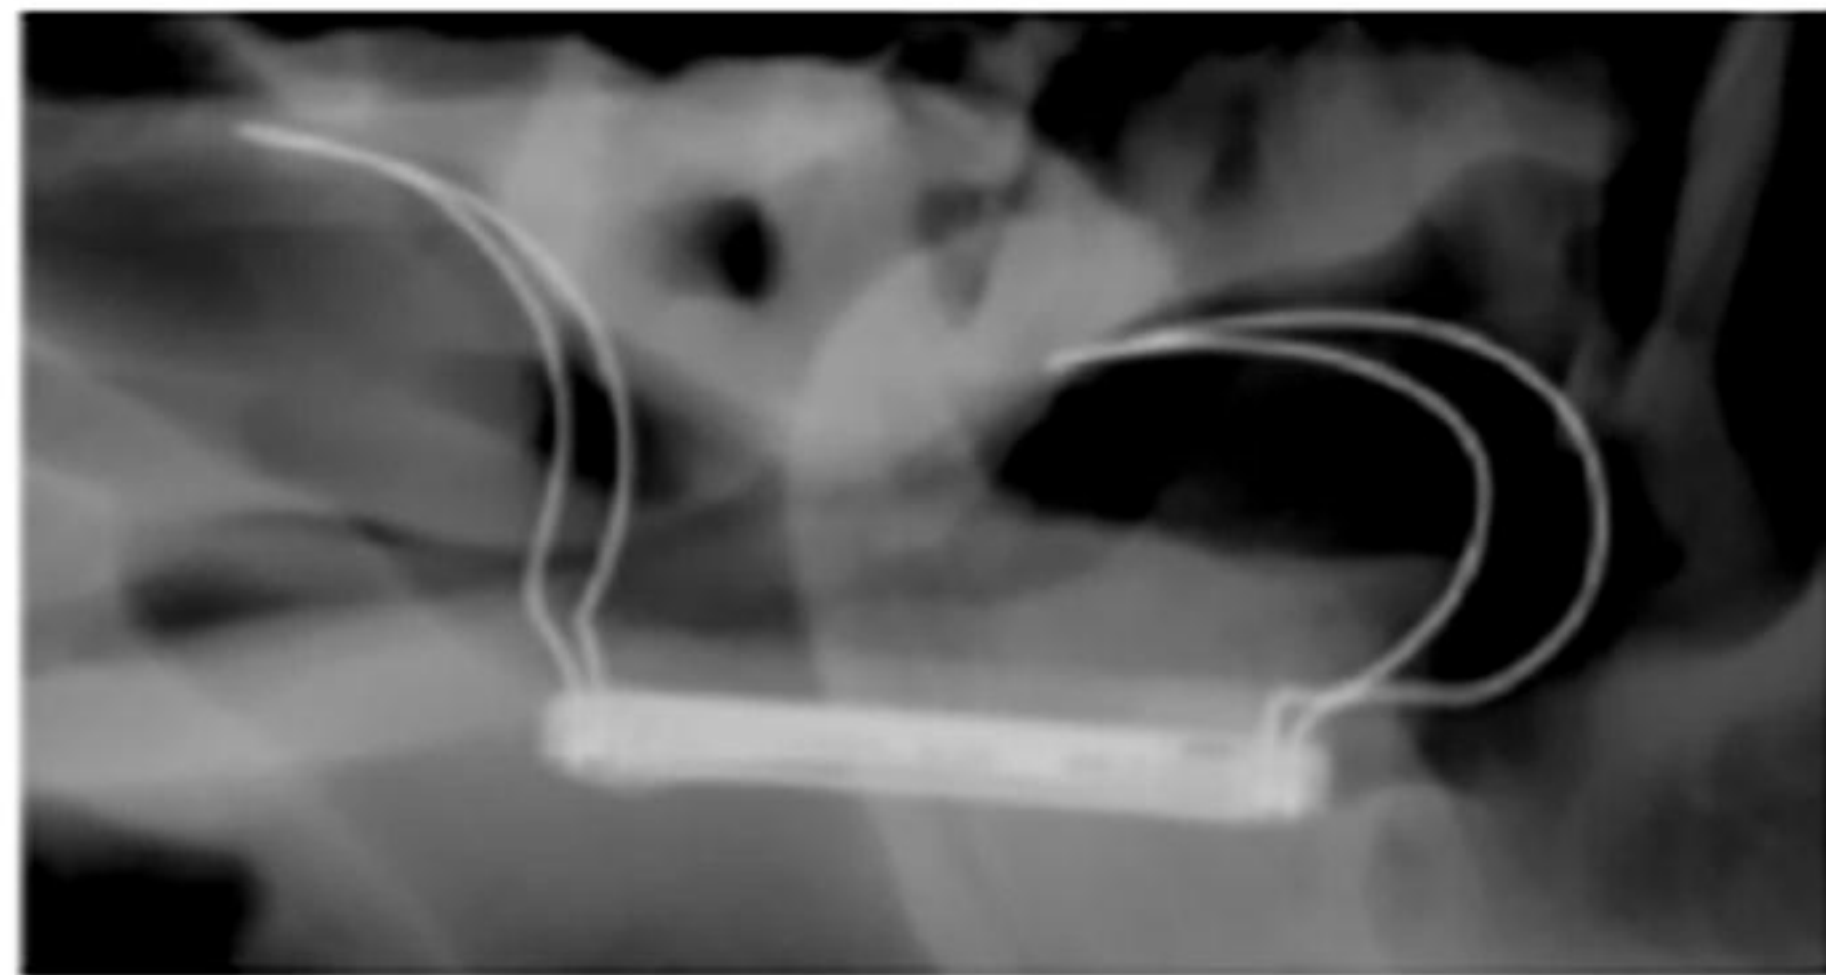**B**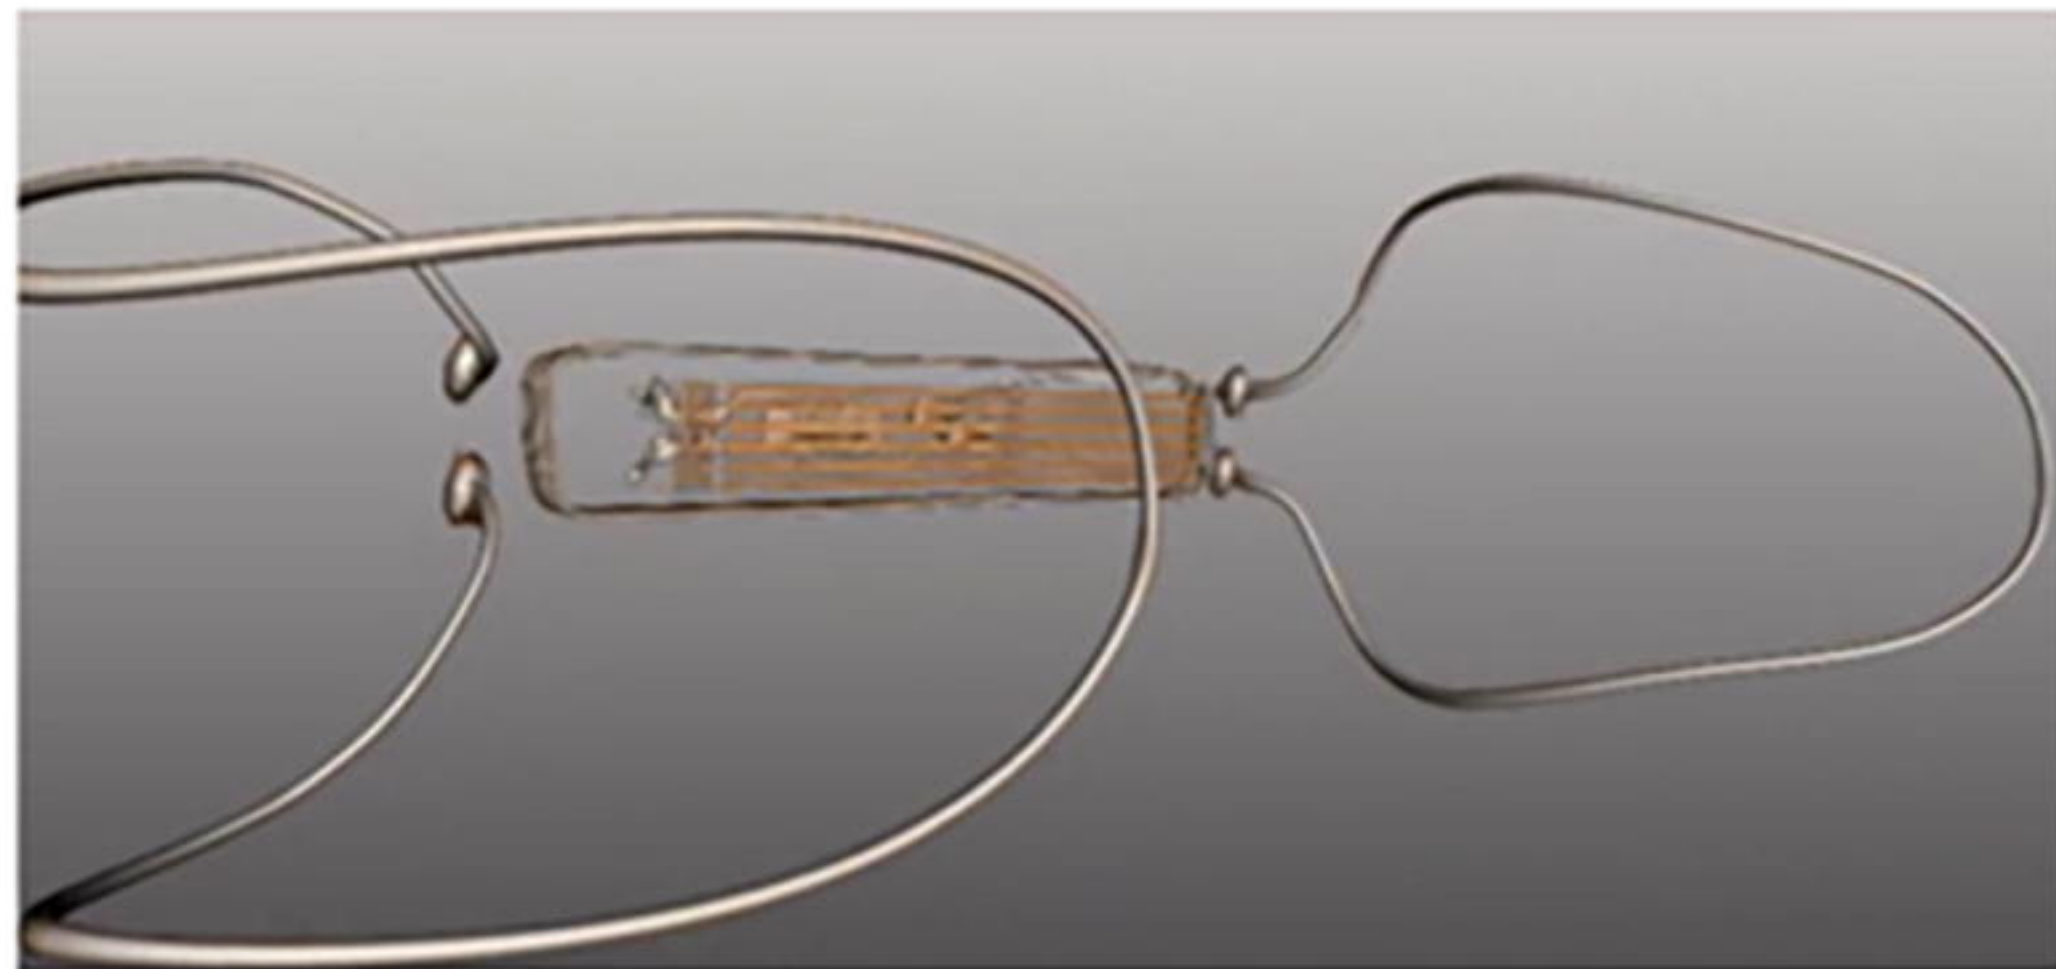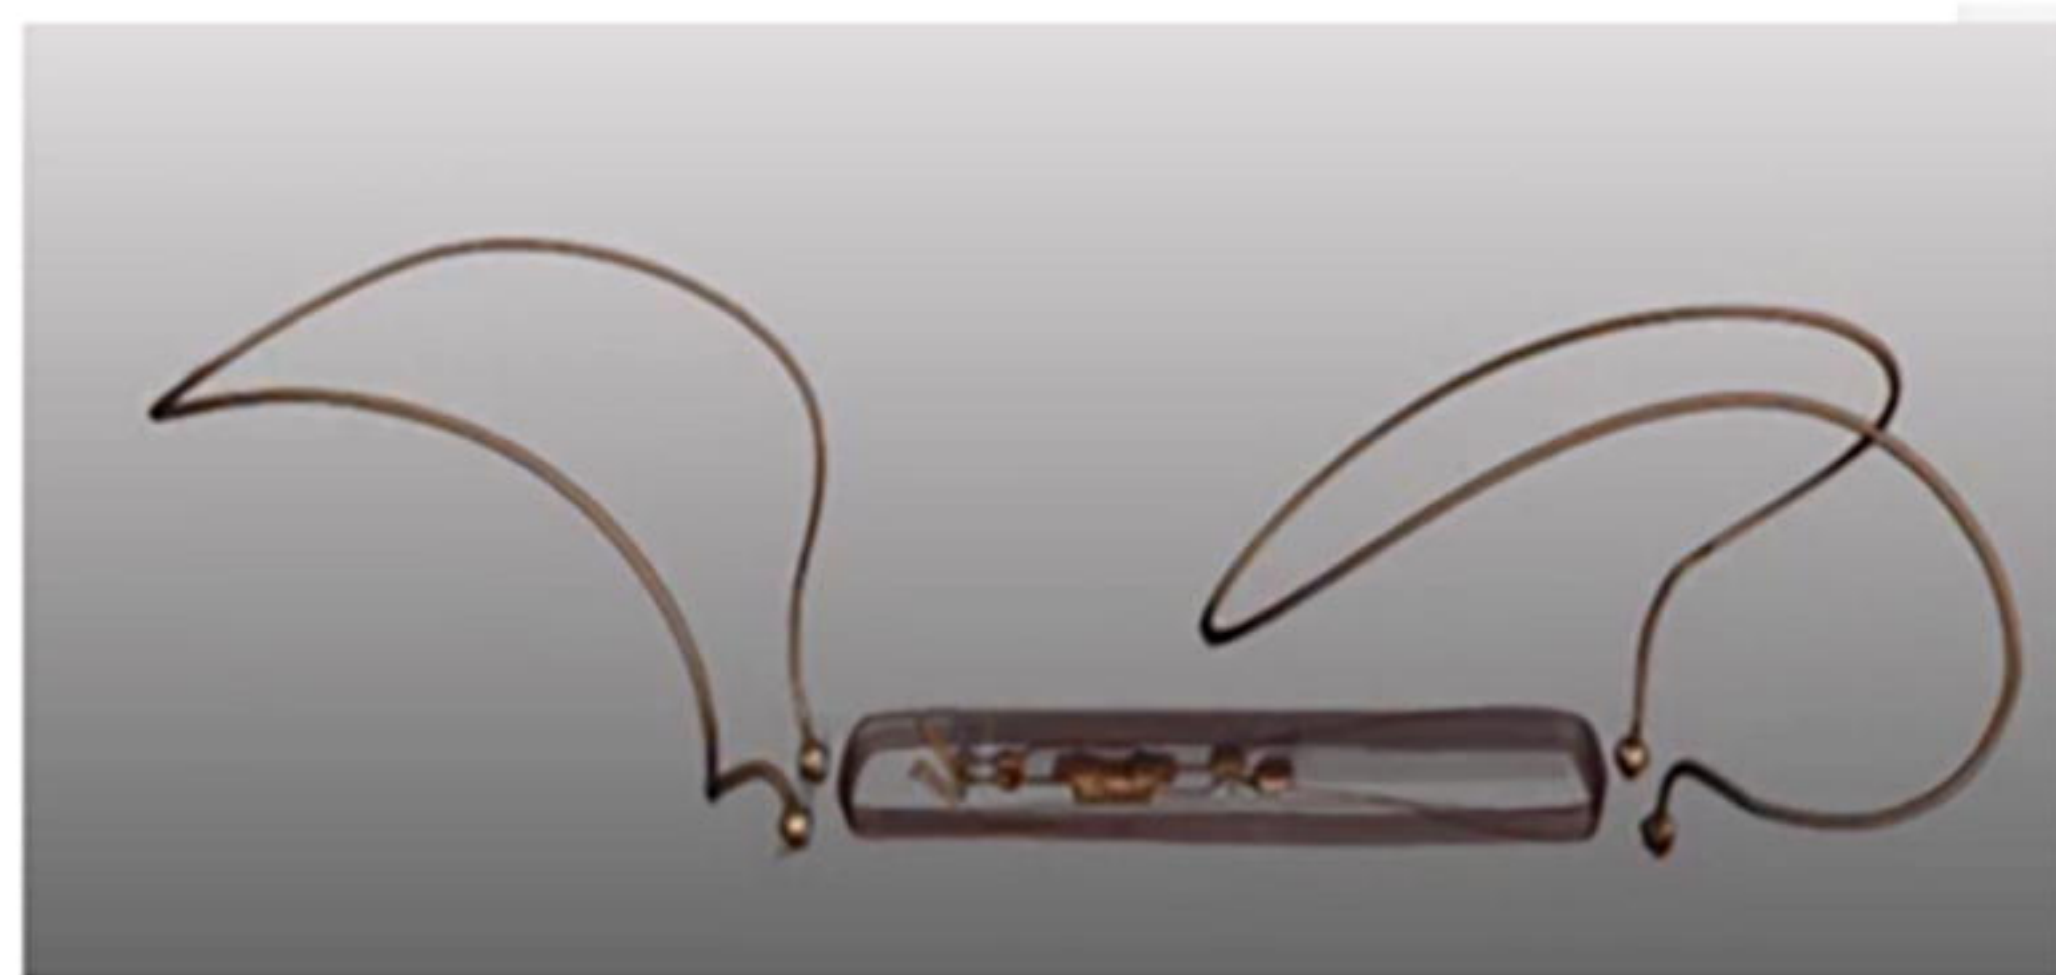



**A**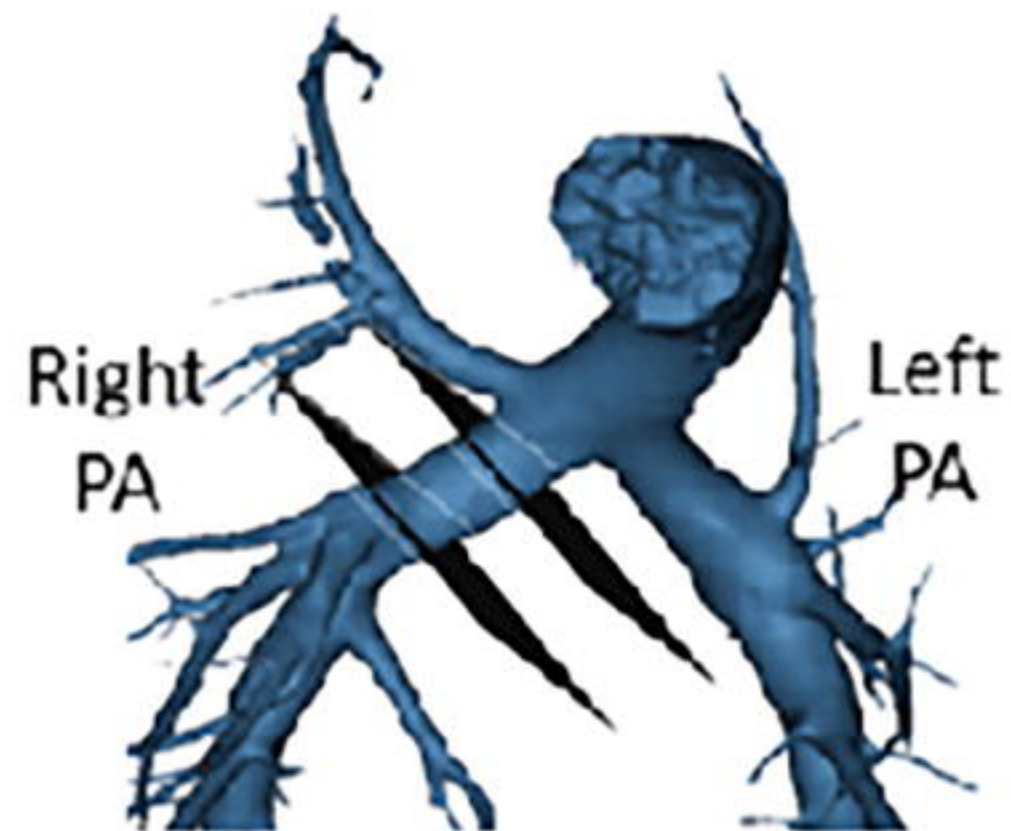**B**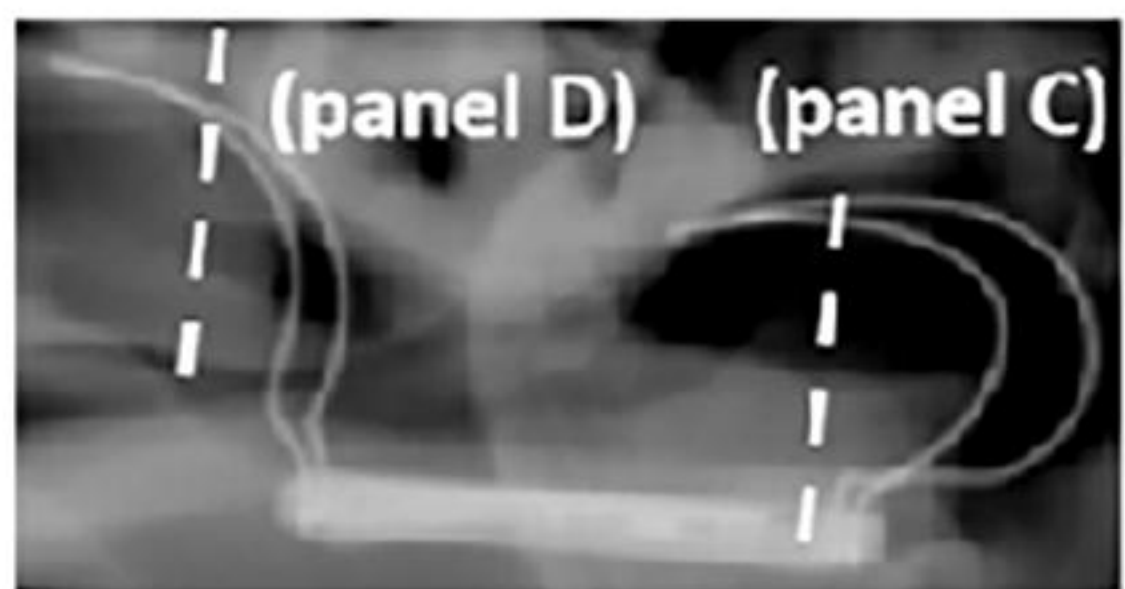**C**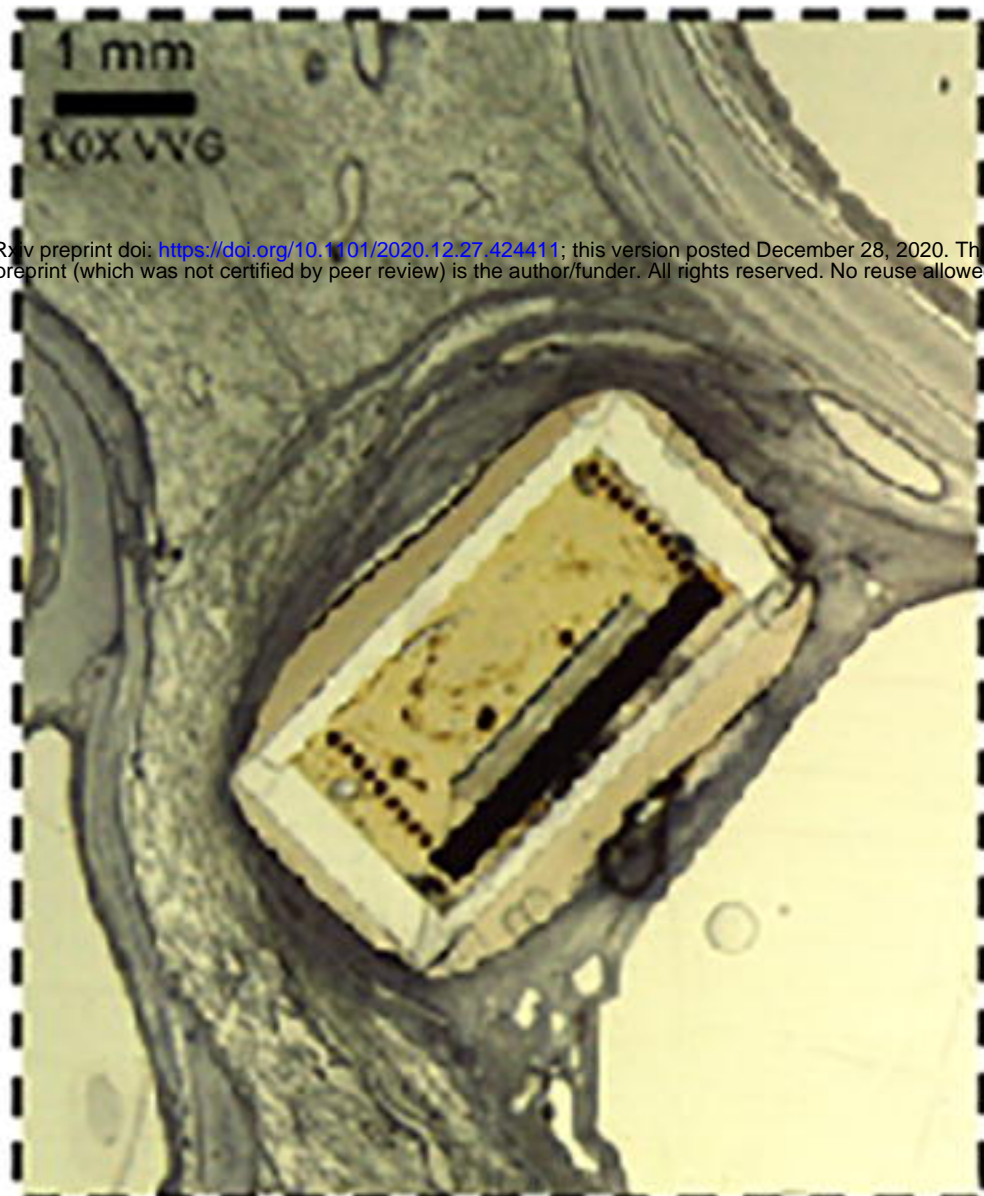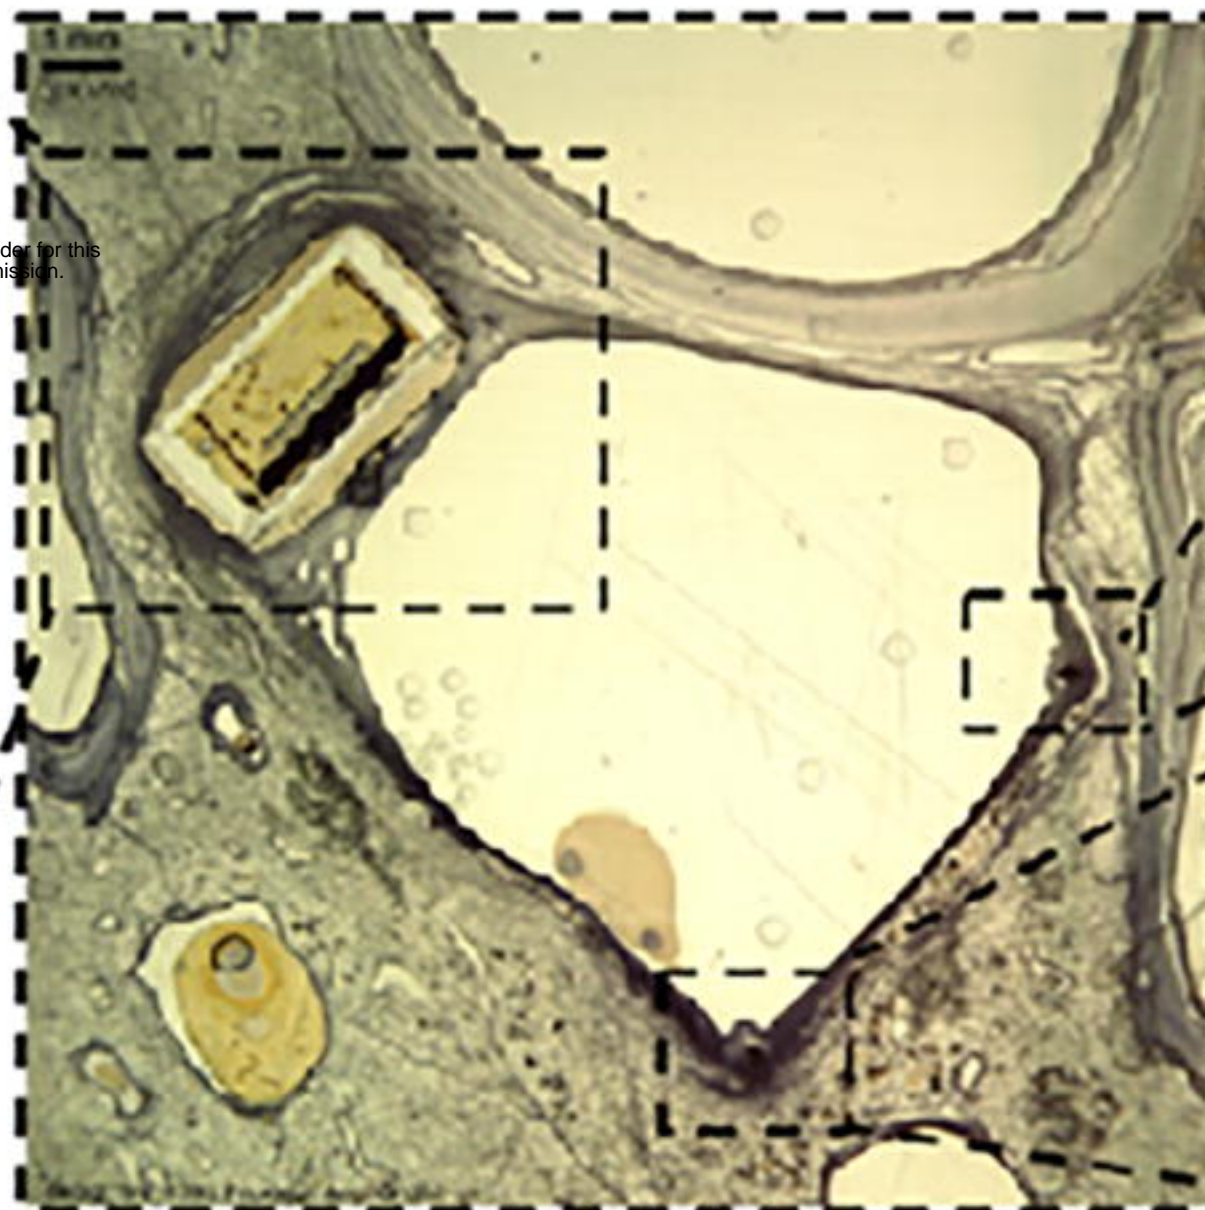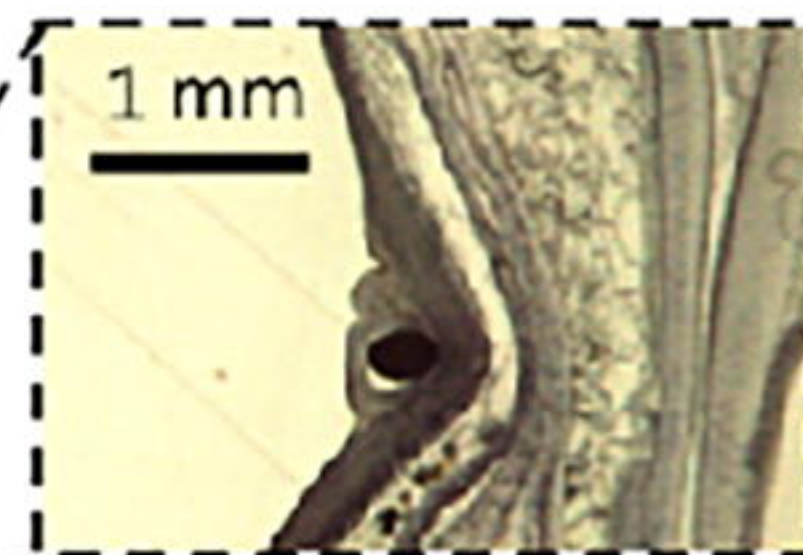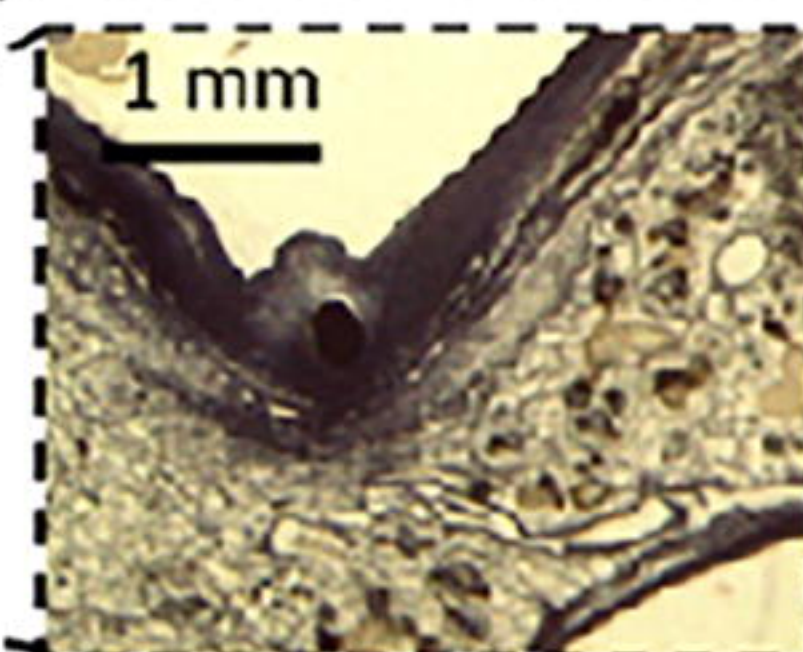**D**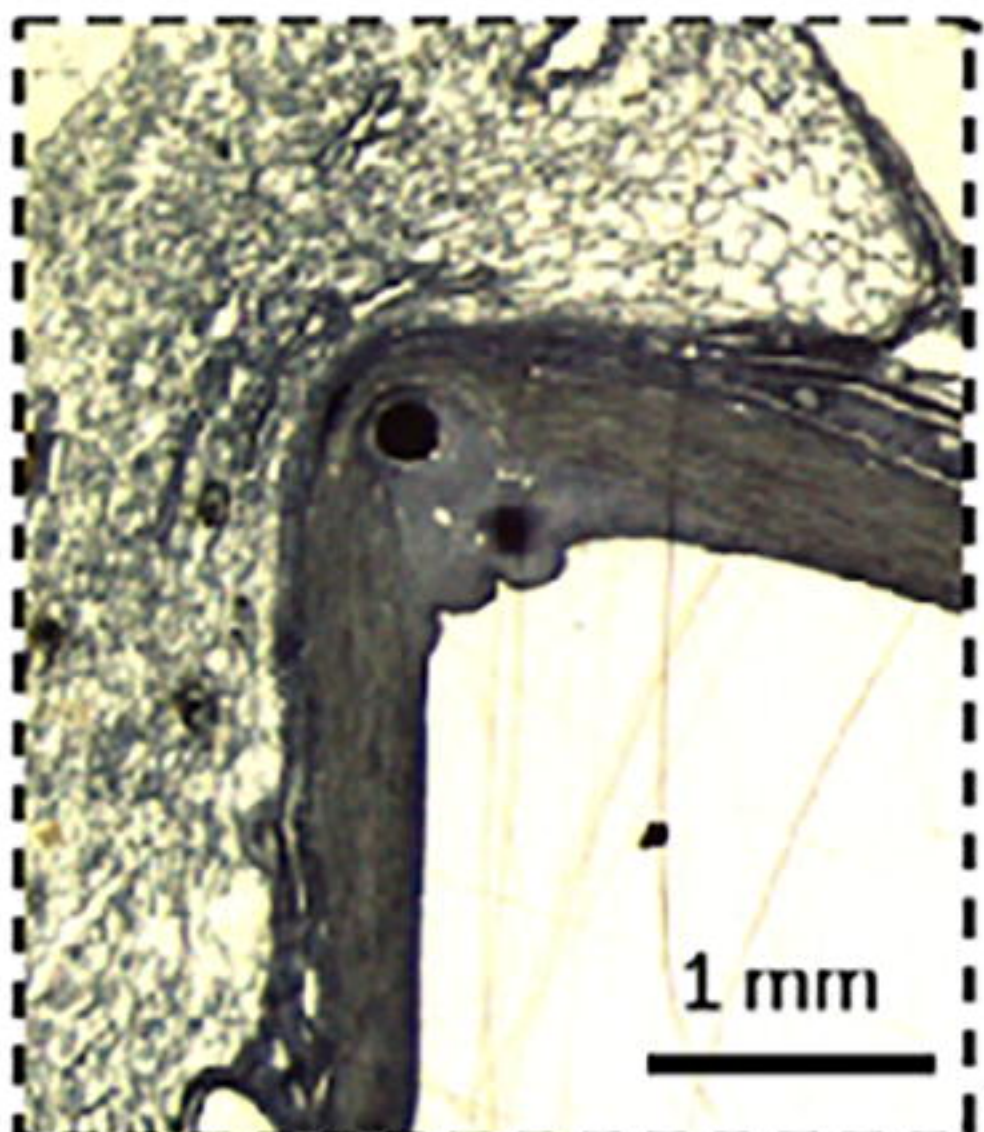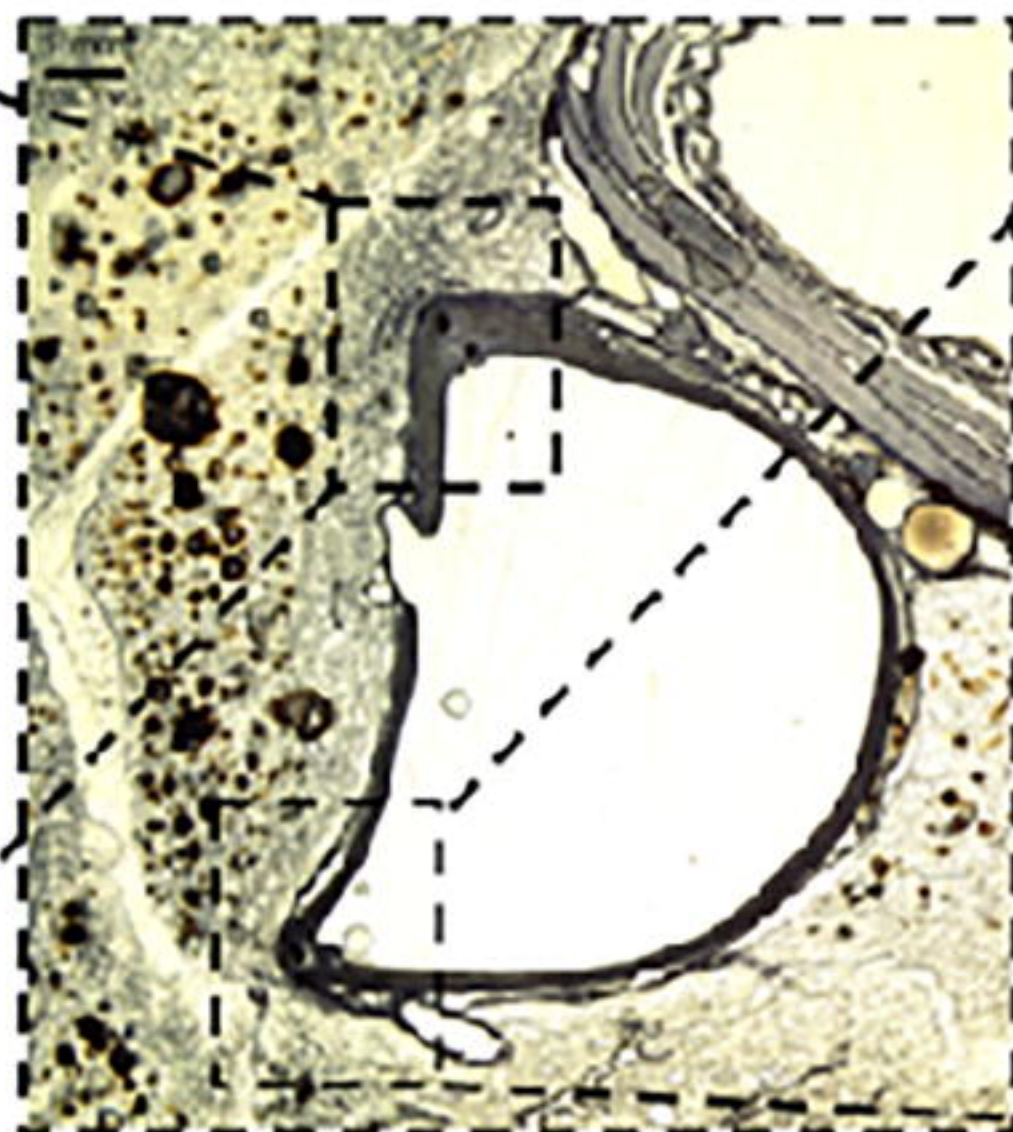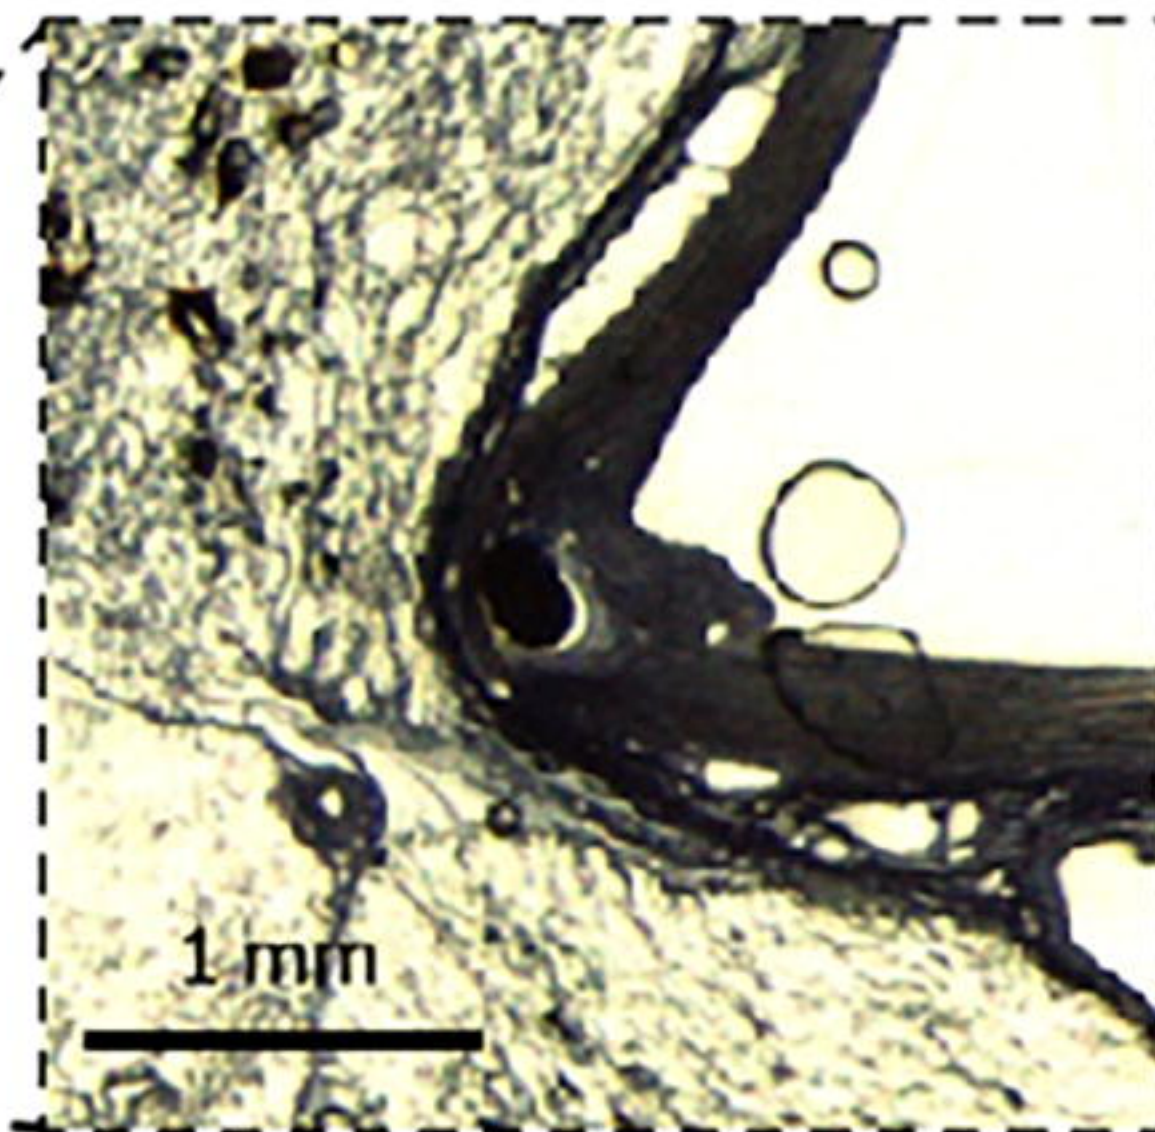

bioRxiv preprint doi: <https://doi.org/10.1101/2020.12.27.424411>; this version posted December 28, 2020. The copyright holder for this preprint (which was not certified by peer review) is the author/funder. All rights reserved. No reuse allowed without permission.
